# Supplementary material
Source: PubMed Central journal article supplement (PMC4910881)
Supplement: NIHMS790966-supplement-Supplement.pdf [file NIHMS790966-supplement-Supplement.pdf]

# Enhancer-promoter interactions are encoded by complex genomic signatures on looping chromatin

Sean Whalen

Rebecca M. Truty

Katherine S. Pollard

March 4, 2016

# Supplemental Material

## Supplementary Note

This study demonstrates that complex genomic signatures strongly distinguish the true targets of active enhancers from other active but non-interacting promoters in the same loci. These signatures are primarily based on patterns of protein binding and epigenetic modifications on the looping chromatin. A unique feature of our approach is the combination of high resolution genome-wide Hi-C interaction data [1] with the vast functional genomics datasets provided by the ENCODE and Roadmap Epigenomics projects partitioned by enhancer, promoter, and window regions. By integrating these diverse datasets and examining their relevance to enhancer-promoter interactions, we computed the most predictive datasets and highlighted the complex interplay between regulatory proteins and DNA in the three-dimensional genome.

Careful examination of many enhancer-promoter pairs across cell lines suggests several broad rules influence TargetFinders score of an enhancer-promoter interaction: 1) whether the enhancer looks truly active in a given cell line (reducing false positive annotations), 2) whether the target promoter has lineage-specific marks, 3) whether the target is actively elongating, 4) whether alternate promoters near the target have marks of repression or paused polymerase, 5) whether other pairs are interacting in the window, 6) whether the interaction crosses a contact domain or TAD, and 7) whether known looping factors are bound near the enhancer and promoter or within the window.

Our predictive accuracy and biological insights depended critically on the decision to include genomic data from the window between each enhancer and promoter in the analyses. We discovered these window features dominated those encoding chromatin states at the promoter and enhancer themselves. Because all enhancers and promoters we studied, including non-interacting pairs, had sufficient activation marks to be called by ChromHMM/Segway, our analysis revealed more subtle and complex genomic signatures that distinguish regulatory targets from poised, paused, or insulated promoters. The genomic signature of looping DNA has several components. First, interacting pairs are depleted for insulator and contact domain crossings in the window (Supplementary Figures 8 and 10), particularly for more distal interactions. Second, interacting pairs are depleted for cohesin complex bound to the window (Supplementary Figure 11), although it is prevalent near the enhancer and promoter. Third, DNA between interacting enhancers and promoters tends to lack activating TFs and epigenetic marks of elongation (Supplementary Figure 12) which could indicate the presence of an alternative promoter target, and indeed is depleted for active promoters (Supplementary Figure 13). On the other hand, windows do contain epigenetic marks associated with heterochromatin (Supplementary Figure 7), polycomb-associated proteins, and co-factors of CTCF associated with its insulator function. Looping interactions in the window are highly enriched (Supplementary Figure 14), strongly supporting existing evidence for TADs or contact domains and suggesting window features may be a proxy for domain membership.

### Alternate software implementation

To confirm robustness to underlying software, an alternative version of the *TargetFinder* pipeline was implemented in R using the `caret` [2], `randomForest` [3], `gbm` [4], and `glmnet` [5] packages. Results were consistent with the Python version.

### Alternate promoter and enhancer definitions

Before transitioning to annotation-based enhancers, we defined candidate enhancers as transcription factor binding sites (TFBS) identified by CENTIPEDE [6], lifted these over from the hg18 to hg19 assembly, and clustered them [7] using the DBSCAN algorithm [8] with `eps = 300` and `min_samples = 1`. Finally, we intersected the resulting TFBS clusters with EP300, H3K27ac, and H3K4me1 ChIP-seq peaks from the same cell line and retained all clusters that overlapped at least one of these ChIP-seq marks. Clusters closer than 10Kb to the nearest promoter were discarded. Promoters were defined using a fixed 1 Kb window centered at the transcription start site of each expressed gene. This approach had comparable performance for 5C-assayed interactions but was outperformed by segmentation based enhancer and promoter definitions for Hi-C-assayed interactions.

### **Alternate interaction data**

To assess the robustness of our approach to interaction data, we used chromosome conformation capture carbon copy (5C) data from ENCODE that also identifies physically interacting segments of the genome [9]. Enhancers were intersected with forward 5C fragments and promoters with reverse 5C fragments. Following the ENCODE standard for interaction significance, enhancer-promoter pairs with fragments found to interact across both 5C biological replicates were given positive labels in our training data. To select negatives matching the distribution of interaction distances, positives were first assigned a bin number using quantile discretization of the distance between enhancers and promoters. For each positive distance bin, 200 negatives were generated by randomly selecting non-interacting enhancer-promoter pairs within the ENCODE pilot regions. The number of negatives per bin was limited by the number of active promoters covered by reverse 5C fragments. Performance and variable importance results were generally consistent between our 5C and Hi-C analyses, but performance was better using the larger Hi-C dataset.

### **Data quality affects predictive accuracy**

Read length, read quality, alignment quality, sequencing depth, antibodies, cell lines, and lab protocols all influence the quality of ChIP-seq data and in turn affect downstream predictive models. For example, a protein expected to be important could be redundant with another more discriminative protein, or may merely lack a good antibody. Supporting this notion, we observe large variance in CTCF binding across data sets from different labs (Supplementary Figure 6), which likely contributes to quantitative differences in the predictive importance of a feature. We added ENCODE phase 3 experiments to *TargetFinder* and found they generally receive a better predictive rank than older ones.

## Supplemental Tables

| Cell Line | Promoters | Enhancers | Interacting Pairs | Non-Interacting Pairs |
|-----------|-----------|-----------|-------------------|-----------------------|
| K562      | 8196      | 82806     | 1977              | 39500                 |
| GM12878   | 8453      | 100036    | 2113              | 42200                 |
| HeLa-S3   | 7794      | 103460    | 1740              | 34800                 |
| HUVEC     | 8180      | 65358     | 1524              | 30400                 |
| IMR90     | 5253      | 108996    | 1254              | 25000                 |
| NHEK      | 5254      | 144302    | 1291              | 25600                 |

Supplementary Table 1: Counts of promoters, enhancers, interacting pairs, and non-interacting pairs per cell line.

Supplementary Table 2: Datasets and accession ids for each cell line, with blanks indicating unavailability.

|                               | Cell Line |          |          |          |          |          |
|-------------------------------|-----------|----------|----------|----------|----------|----------|
|                               | K562      | GM12878  | HeLa-S3  | HUVEC    | IMR90    | NHEK     |
| CAGE                          | GSE34448  | GSE34448 | GSE34448 | GSE34448 |          | GSE34448 |
| ChIP-seq (ARID3A)             | GSE31477  |          |          |          |          |          |
| ChIP-seq (ATF1)               | GSE31477  |          |          |          |          |          |
| ChIP-seq (ATF2)               |           | GSE32465 |          |          |          |          |
| ChIP-seq (ATF3)               | GSE32465  | GSE32465 |          |          |          |          |
| ChIP-seq (BACH1)              | GSE31477  |          |          |          |          |          |
| ChIP-seq (BATF)               |           | GSE32465 |          |          |          |          |
| ChIP-seq (BCL11A)             |           | GSE32465 |          |          |          |          |
| ChIP-seq (BCL3)               | GSE32465  | GSE32465 |          |          |          |          |
| ChIP-seq (BCLAF1)             | GSE32465  | GSE32465 |          |          |          |          |
| ChIP-seq (BDP1)               | GSE31477  |          | GSE31477 |          | GSE47849 |          |
| ChIP-seq (BHLHE40)            | GSE31477  | GSE31477 |          |          |          |          |
| ChIP-seq (BRCA1)              |           | GSE31477 | GSE31477 |          |          |          |
| ChIP-seq (BRF1)               | GSE31477  |          | GSE31477 |          |          |          |
| ChIP-seq (BRF2)               | GSE31477  |          | GSE31477 |          |          |          |
| ChIP-seq (CBX2)               | GSE29611  |          |          |          |          |          |
| ChIP-seq (CBX3)               | GSE32465  |          |          |          |          |          |
| ChIP-seq (CBX8)               | GSE29611  |          |          |          |          |          |
| ChIP-seq (CCNT2)              | GSE31477  |          |          |          |          |          |
| ChIP-seq (CEBPB)              | GSE32465  | GSE32465 | GSE31477 |          | GSE31477 |          |
| ChIP-seq (CEBPD)              | GSE32465  |          |          |          |          |          |
| ChIP-seq (CHD1)               | GSE29611  | GSE31477 |          |          | GSE31477 |          |
| ChIP-seq (CHD2)               | GSE31477  | GSE31477 | GSE31477 |          |          |          |
| ChIP-seq (CHD4)               | GSE29611  |          |          |          |          |          |
| ChIP-seq (CHD7)               | GSE29611  |          |          |          |          |          |
| ChIP-seq (CREB1)              | GSE32465  | GSE32465 |          |          |          |          |
| ChIP-seq (CREBBP)             | GSE29611  |          |          |          |          |          |
| ChIP-seq (CTCF)               | GSE32465  | GSE29611 | GSE29611 | GSE29611 | GSE31477 | GSE29611 |
| ChIP-seq (CTCF <sub>L</sub> ) | GSE32465  |          |          |          |          |          |
| ChIP-seq (CUX1)               | GSE31477  | GSE31477 |          |          |          |          |
| ChIP-seq (E2F1)               |           |          | GSE31477 |          |          |          |
| ChIP-seq (E2F4)               | GSE31477  | GSE31477 | GSE31477 |          |          |          |
| ChIP-seq (E2F6)               | GSE32465  |          | GSE31477 |          |          |          |
| ChIP-seq (EBF1)               |           | GSE32465 |          |          |          |          |
| ChIP-seq (EGR1)               | GSE32465  | GSE32465 |          |          |          |          |

Supplementary Table 2: Datasets and accession ids for each cell line, with blanks indicating unavailability.

|                      | Cell Line |          |          |          |          |          |
|----------------------|-----------|----------|----------|----------|----------|----------|
|                      | K562      | GM12878  | HeLa-S3  | HUVEC    | IMR90    | NHEK     |
| ChIP-seq (ELF1)      | GSE32465  | GSE32465 |          |          |          |          |
| ChIP-seq (ELK1)      | GSE31477  | GSE31477 | GSE31477 |          |          |          |
| ChIP-seq (ELK4)      |           |          | GSE31477 |          |          |          |
| ChIP-seq (EP300)     | GSE29611  | GSE31477 | GSE31477 |          | GSE43070 |          |
| ChIP-seq (ETS1)      | GSE32465  | GSE32465 |          |          |          |          |
| ChIP-seq (EZH2)      | GSE29611  | GSE29611 | GSE29611 | GSE29611 |          | GSE29611 |
| ChIP-seq (FOS)       | GSE31363  | GSE31477 | GSE31477 | GSE31477 |          |          |
| ChIP-seq (FOSL1)     | GSE32465  |          |          |          |          |          |
| ChIP-seq (FOXM1)     |           | GSE32465 |          |          |          |          |
| ChIP-seq (GABPA)     | GSE32465  | GSE32465 | GSE32465 |          |          |          |
| ChIP-seq (GATA1)     | GSE31477  |          |          |          |          |          |
| ChIP-seq (GATA2)     | GSE32465  |          |          | GSE31477 |          |          |
| ChIP-seq (GDOWN1)    |           |          |          |          | GSE33128 |          |
| ChIP-seq (GRHL3)     |           |          |          |          |          | GSE42180 |
| ChIP-seq (GTF2B)     | GSE31477  |          |          |          |          |          |
| ChIP-seq (GTF2F1)    | GSE31477  |          | GSE31477 |          |          |          |
| ChIP-seq (GTF3C2)    | GSE31477  |          | GSE31477 |          |          |          |
| ChIP-seq (H1B)       |           |          |          |          | GSE26979 |          |
| ChIP-seq (H2AK5ac)   |           |          |          |          | GSE16256 |          |
| ChIP-seq (H2AK9ac)   |           |          |          |          | GSE16256 |          |
| ChIP-seq (H2AY)      |           |          |          |          | GSE54847 |          |
| ChIP-seq (H2AZ)      | GSE29611  | GSE29611 | GSE29611 | GSE29611 | GSE16256 | GSE29611 |
| ChIP-seq (H2BK120ac) |           |          |          |          | GSE16256 |          |
| ChIP-seq (H2BK12ac)  |           |          |          |          | GSE16256 |          |
| ChIP-seq (H2BK15ac)  |           |          |          |          | GSE16256 |          |
| ChIP-seq (H2BK20ac)  |           |          |          |          | GSE16256 |          |
| ChIP-seq (H2BK5ac)   |           |          |          |          | GSE16256 |          |
| ChIP-seq (H3K14ac)   |           |          |          |          | GSE16256 |          |
| ChIP-seq (H3K18ac)   |           |          |          |          | GSE16256 |          |
| ChIP-seq (H3K23ac)   |           |          |          |          | GSE16256 |          |
| ChIP-seq (H3K27ac)   | GSE29611  | GSE29611 | GSE29611 | GSE29611 | GSE16256 | GSE29611 |
| ChIP-seq (H3K27me3)  | GSE29611  | GSE29611 | GSE29611 | GSE29611 | GSE16256 | GSE29611 |
| ChIP-seq (H3K36me3)  | GSE29611  | GSE29611 | GSE29611 | GSE29611 | GSE16256 | GSE29611 |
| ChIP-seq (H3K4ac)    |           |          |          |          | GSE16256 |          |
| ChIP-seq (H3K4me1)   | GSE29611  | GSE29611 | GSE29611 | GSE29611 | GSE16256 | GSE29611 |
| ChIP-seq (H3K4me2)   | GSE29611  | GSE29611 | GSE29611 | GSE29611 | GSE16256 | GSE29611 |
| ChIP-seq (H3K4me3)   | GSE29611  | GSE29611 | GSE29611 | GSE29611 | GSE16256 | GSE29611 |
| ChIP-seq (H3K56ac)   |           |          |          |          | GSE16256 |          |
| ChIP-seq (H3K79me1)  |           |          |          |          | GSE16256 |          |
| ChIP-seq (H3K79me2)  | GSE29611  | GSE29611 | GSE29611 | GSE29611 | GSE16256 | GSE29611 |
| ChIP-seq (H3K9ac)    | GSE29611  | GSE29611 | GSE29611 | GSE29611 | GSE16256 | GSE29611 |
| ChIP-seq (H3K9me1)   | GSE29611  |          |          | GSE29611 |          | GSE29611 |
| ChIP-seq (H3K9me3)   | GSE29611  | GSE29611 | GSE29611 | GSE29611 | GSE16256 | GSE29611 |
| ChIP-seq (H3k9me1)   |           |          |          |          | GSE16256 |          |
| ChIP-seq (H4K16ac)   |           |          |          |          | GSE58740 |          |
| ChIP-seq (H4K20me1)  | GSE29611  | GSE29611 | GSE29611 | GSE29611 | GSE16256 | GSE29611 |
| ChIP-seq (H4K5ac)    |           |          |          |          | GSE16256 |          |
| ChIP-seq (H4K8ac)    |           |          |          |          | GSE16256 |          |
| ChIP-seq (H4K91ac)   |           |          |          |          | GSE16256 |          |

Supplementary Table 2: Datasets and accession ids for each cell line, with blanks indicating unavailability.

|                    | Cell Line |          |          |          |          |          |
|--------------------|-----------|----------|----------|----------|----------|----------|
|                    | K562      | GM12878  | HeLa-S3  | HUVEC    | IMR90    | NHEK     |
| ChIP-seq (HA-E2F1) |           |          | GSE31477 |          |          |          |
| ChIP-seq (HCFC1)   | GSE31477  |          | GSE31477 |          |          |          |
| ChIP-seq (HDAC1)   | GSE29611  |          |          |          |          |          |
| ChIP-seq (HDAC2)   | GSE32465  |          |          |          |          |          |
| ChIP-seq (HDAC6)   | GSE29611  |          |          |          |          |          |
| ChIP-seq (HDAC8)   | GSE31363  |          |          |          |          |          |
| ChIP-seq (HMGN3)   | GSE31477  |          |          |          |          |          |
| ChIP-seq (IKZF1)   |           | GSE31477 |          |          |          |          |
| ChIP-seq (IRF1)    | GSE31477  |          |          |          |          |          |
| ChIP-seq (IRF3)    |           | GSE31477 | GSE31477 |          |          |          |
| ChIP-seq (IRF4)    |           | GSE32465 |          |          |          |          |
| ChIP-seq (JUN)     | GSE31477  |          | GSE31477 | GSE31477 |          |          |
| ChIP-seq (JUNB)    | GSE31363  |          |          |          |          |          |
| ChIP-seq (JUND)    | GSE31477  | GSE31477 | GSE31477 |          |          |          |
| ChIP-seq (KAT2A)   |           | GSE31477 | GSE31477 |          |          |          |
| ChIP-seq (KAT2B)   | GSE29611  |          |          |          |          |          |
| ChIP-seq (KDM1A)   | GSE29611  |          |          |          |          |          |
| ChIP-seq (KDM5B)   | GSE29611  |          |          |          |          |          |
| ChIP-seq (LMNB1)   |           |          |          |          | GSE53332 |          |
| ChIP-seq (MAFF)    | GSE31477  |          |          |          |          |          |
| ChIP-seq (MAFK)    | GSE31477  | GSE31477 | GSE31477 |          | GSE31477 |          |
| ChIP-seq (MAX)     | GSE32465  | GSE31477 | GSE31477 | GSE31477 |          |          |
| ChIP-seq (MAZ)     | GSE31477  | GSE31477 | GSE31477 |          |          | GSE31477 |
| ChIP-seq (MECP2)   |           |          |          |          |          | GSE47678 |
| ChIP-seq (MEF2A)   | GSE32465  | GSE32465 |          |          |          |          |
| ChIP-seq (MEF2C)   |           | GSE32465 |          |          |          |          |
| ChIP-seq (MTA3)    |           | GSE32465 |          |          |          |          |
| ChIP-seq (MXI1)    | GSE31477  | GSE31477 | GSE31477 |          |          | GSE31477 |
| ChIP-seq (MYC)     | GSE31477  | GSE33213 | GSE31477 | GSE33213 |          |          |
| ChIP-seq (NCOR1)   | GSE29611  |          |          |          |          |          |
| ChIP-seq (NELFE)   | GSE31477  |          |          |          |          |          |
| ChIP-seq (NFATC1)  |           | GSE32465 |          |          |          |          |
| ChIP-seq (NFE2)    | GSE31477  | GSE31477 |          |          |          |          |
| ChIP-seq (NFIC)    |           | GSE32465 |          |          |          |          |
| ChIP-seq (NFKB1)   |           | GSE31477 |          |          |          |          |
| ChIP-seq (NFYA)    | GSE31477  | GSE31477 | GSE31477 |          |          |          |
| ChIP-seq (NFYB)    | GSE31477  | GSE31477 | GSE31477 |          |          |          |
| ChIP-seq (NR2C2)   | GSE31477  | GSE31477 | GSE31477 |          |          |          |
| ChIP-seq (NR2F2)   | GSE32465  |          |          |          |          |          |
| ChIP-seq (NR4A1)   | GSE31363  |          |          |          |          |          |
| ChIP-seq (NRF1)    | GSE31477  | GSE31477 | GSE31477 |          |          |          |
| ChIP-seq (PAX5)    |           | GSE32465 |          |          |          |          |
| ChIP-seq (PBX3)    |           | GSE32465 |          |          |          |          |
| ChIP-seq (PHF8)    | GSE29611  |          |          |          |          |          |
| ChIP-seq (PML)     | GSE32465  | GSE32465 |          |          |          |          |
| ChIP-seq (POLR2A)  | GSE32465  | GSE32465 | GSE32465 | GSE31477 | GSE31477 | GSE29611 |
| ChIP-seq (POLR3A)  |           |          | GSE31477 |          |          |          |
| ChIP-seq (POLR3D)  |           |          |          |          | GSE47849 |          |
| ChIP-seq (POLR3G)  | GSE31477  | GSE31477 |          |          | GSE47849 |          |

Supplementary Table 2: Datasets and accession ids for each cell line, with blanks indicating unavailability.

|                     | Cell Line |          |          |       |          |      |
|---------------------|-----------|----------|----------|-------|----------|------|
|                     | K562      | GM12878  | HeLa-S3  | HUVEC | IMR90    | NHEK |
| ChIP-seq (POLR3GL)  |           |          |          |       | GSE47849 |      |
| ChIP-seq (POU2F2)   |           | GSE32465 |          |       |          |      |
| ChIP-seq (PRDM1)    |           |          | GSE31477 |       |          |      |
| ChIP-seq (RAD21)    | GSE32465  | GSE32465 | GSE31477 |       | GSE31477 |      |
| ChIP-seq (RB1)      |           |          |          |       | GSE19899 |      |
| ChIP-seq (RBBP5)    | GSE29611  |          |          |       |          |      |
| ChIP-seq (RBL2)     |           |          |          |       | GSE19899 |      |
| ChIP-seq (RCOR1)    | GSE31477  | GSE31477 | GSE31477 |       | GSE31477 |      |
| ChIP-seq (RELA)     |           |          |          |       | GSE43070 |      |
| ChIP-seq (REST)     | GSE32465  | GSE32465 | GSE32465 |       |          |      |
| ChIP-seq (RFX5)     | GSE31477  | GSE31477 | GSE31477 |       | GSE31477 |      |
| ChIP-seq (RNF2)     | GSE29611  |          |          |       |          |      |
| ChIP-seq (RUNX3)    |           | GSE32465 |          |       |          |      |
| ChIP-seq (RXRA)     |           | GSE32465 |          |       |          |      |
| ChIP-seq (SAP30)    | GSE29611  |          |          |       |          |      |
| ChIP-seq (SETDB1)   | GSE31477  |          |          |       |          |      |
| ChIP-seq (SIN3A)    |           | GSE31477 |          |       |          |      |
| ChIP-seq (SIN3AK20) | GSE32465  |          |          |       |          |      |
| ChIP-seq (SIRT6)    | GSE31477  |          |          |       |          |      |
| ChIP-seq (SIX5)     | GSE32465  | GSE32465 |          |       |          |      |
| ChIP-seq (SMARCA4)  | GSE31477  |          | GSE31477 |       |          |      |
| ChIP-seq (SMARCB1)  | GSE31477  |          | GSE31477 |       |          |      |
| ChIP-seq (SMARCC1)  |           |          | GSE31477 |       |          |      |
| ChIP-seq (SMARCC2)  |           |          | GSE31477 |       |          |      |
| ChIP-seq (SMC3)     | GSE31477  | GSE31477 | GSE31477 |       |          |      |
| ChIP-seq (SP1)      | GSE32465  | GSE32465 |          |       |          |      |
| ChIP-seq (SP2)      | GSE32465  |          |          |       |          |      |
| ChIP-seq (SPI1)     | GSE32465  | GSE32465 |          |       |          |      |
| ChIP-seq (SREBF1)   |           | GSE31477 |          |       |          |      |
| ChIP-seq (SREBF2)   |           | GSE31477 |          |       |          |      |
| ChIP-seq (SRF)      | GSE32465  | GSE32465 |          |       |          |      |
| ChIP-seq (STAT1)    | GSE31477  | GSE31477 | GSE31477 |       |          |      |
| ChIP-seq (STAT2)    | GSE31477  |          |          |       |          |      |
| ChIP-seq (STAT3)    |           | GSE31477 | GSE31477 |       |          |      |
| ChIP-seq (STAT5A)   | GSE32465  | GSE32465 |          |       |          |      |
| ChIP-seq (SUMO2-C)  | GSE66448  |          |          |       |          |      |
| ChIP-seq (SUMO2-HS) | GSE66448  |          |          |       |          |      |
| ChIP-seq (SUPT20H)  |           | GSE31477 | GSE31477 |       |          |      |
| ChIP-seq (SUZ12)    | GSE29611  |          |          |       |          |      |
| ChIP-seq (TAF1)     | GSE32465  | GSE32465 | GSE32465 |       |          |      |
| ChIP-seq (TAF7)     | GSE32465  |          |          |       |          |      |
| ChIP-seq (TAL1)     | GSE31477  |          |          |       |          |      |
| ChIP-seq (TBL1XR1)  | GSE31477  | GSE31477 |          |       |          |      |
| ChIP-seq (TBP)      | GSE31477  | GSE31477 | GSE31477 |       |          |      |
| ChIP-seq (TCF12)    |           | GSE32465 |          |       |          |      |
| ChIP-seq (TCF3)     |           | GSE32465 |          |       |          |      |
| ChIP-seq (TCF7L2)   |           |          | GSE31477 |       |          |      |
| ChIP-seq (TEAD4)    | GSE32465  |          |          |       |          |      |
| ChIP-seq (TFAP2A)   |           |          | GSE31477 |       |          |      |

Supplementary Table 2: Datasets and accession ids for each cell line, with blanks indicating unavailability.

|                    | Cell Line |          |          |          |          |          |
|--------------------|-----------|----------|----------|----------|----------|----------|
|                    | K562      | GM12878  | HeLa-S3  | HUVEC    | IMR90    | NHEK     |
| ChIP-seq (TFAP2C)  |           |          | GSE31477 |          |          |          |
| ChIP-seq (THAP1)   | GSE32465  |          |          |          |          |          |
| ChIP-seq (TP53)    |           |          |          |          | GSE58740 |          |
| ChIP-seq (TRIM28)  | GSE32465  |          |          |          |          |          |
| ChIP-seq (UBTF)    | GSE31477  |          |          |          |          |          |
| ChIP-seq (USF1)    | GSE32465  | GSE32465 |          |          |          |          |
| ChIP-seq (USF2)    | GSE31477  | GSE31477 | GSE31477 |          |          |          |
| ChIP-seq (WDR5)    |           |          |          |          |          | GSE42180 |
| ChIP-seq (WHSC1)   | GSE29611  |          |          |          |          |          |
| ChIP-seq (WRNIP1)  |           | GSE31477 |          |          |          |          |
| ChIP-seq (XRCC4)   | GSE31477  |          |          |          |          |          |
| ChIP-seq (YAP1)    |           |          |          |          | GSE61852 |          |
| ChIP-seq (YY1)     | GSE32465  | GSE31477 |          |          |          |          |
| ChIP-seq (ZBTB33)  | GSE32465  | GSE32465 |          |          |          |          |
| ChIP-seq (ZBTB7A)  | GSE32465  |          |          |          |          |          |
| ChIP-seq (ZC3H11A) | GSE31477  |          |          |          |          |          |
| ChIP-seq (ZEB1)    |           | GSE32465 |          |          |          |          |
| ChIP-seq (ZKSCAN1) |           |          | GSE31477 |          |          |          |
| ChIP-seq (ZMIZ1)   | GSE31477  |          |          |          |          |          |
| ChIP-seq (ZNF143)  | GSE31477  | GSE31477 | GSE31477 |          |          |          |
| ChIP-seq (ZNF263)  | GSE31477  |          |          |          |          |          |
| ChIP-seq (ZNF274)  | GSE31477  | GSE31477 | GSE31477 |          |          |          |
| ChIP-seq (ZNF384)  | GSE31477  | GSE31477 |          |          |          |          |
| ChIP-seq (ZZZ3)    |           | GSE31477 | GSE31477 |          |          |          |
| DNase-seq          | GSE29692  | GSE29692 | GSE29692 | GSE29692 | GSE18927 | GSE29692 |
| FAIRE-seq          | GSE35239  | GSE35239 | GSE35239 | GSE35239 |          | GSE35239 |
| Methyl-RRBS        | GSE27584  | GSE27584 | GSE27584 |          | GSE27584 |          |
| <b>Total</b>       | 136       | 100      | 73       | 23       | 56       | 20       |



| Cell Line | Region | Model         | TP   | TN    | FP    | FN   | AUC  | MCC   | FDR  | F <sub>1</sub> |
|-----------|--------|---------------|------|-------|-------|------|------|-------|------|----------------|
| GM12878   | EE/P   | Baseline      | 1788 | 35951 | 35149 | 1771 | 0.50 | 0.00  | 0.95 | 0.09           |
| GM12878   | EE/P   | Boosted Trees | 2861 | 70742 | 358   | 698  | 0.90 | 0.84  | 0.11 | 0.84           |
| GM12878   | EE/P   | Linear SVM    | 1697 | 64449 | 6651  | 1862 | 0.69 | 0.26  | 0.80 | 0.29           |
| GM12878   | EE/P   | Decision Tree | 2262 | 69250 | 1850  | 1297 | 0.80 | 0.57  | 0.45 | 0.59           |
| GM12878   | E/P    | Baseline      | 1033 | 20945 | 21255 | 1080 | 0.49 | -0.01 | 0.95 | 0.08           |
| GM12878   | E/P    | Boosted Trees | 1134 | 41600 | 600   | 979  | 0.76 | 0.57  | 0.35 | 0.59           |
| GM12878   | E/P    | Linear SVM    | 1137 | 34159 | 8041  | 976  | 0.67 | 0.18  | 0.88 | 0.20           |
| GM12878   | E/P    | Decision Tree | 893  | 40867 | 1333  | 1220 | 0.70 | 0.38  | 0.60 | 0.41           |
| GM12878   | E/P/W  | Baseline      | 1033 | 20945 | 21255 | 1080 | 0.49 | -0.01 | 0.95 | 0.08           |
| GM12878   | E/P/W  | Boosted Trees | 1595 | 41978 | 222   | 518  | 0.87 | 0.81  | 0.12 | 0.81           |
| GM12878   | E/P/W  | Linear SVM    | 1016 | 37311 | 4889  | 1097 | 0.68 | 0.23  | 0.83 | 0.25           |
| GM12878   | E/P/W  | Decision Tree | 1170 | 40966 | 1234  | 943  | 0.76 | 0.49  | 0.51 | 0.52           |
| HUVEC     | EE/P   | Baseline      | 922  | 19060 | 19540 | 1010 | 0.49 | -0.01 | 0.95 | 0.08           |
| HUVEC     | EE/P   | Boosted Trees | 1227 | 38298 | 302   | 705  | 0.81 | 0.70  | 0.20 | 0.71           |
| HUVEC     | EE/P   | Linear SVM    | 1105 | 29145 | 9455  | 827  | 0.66 | 0.16  | 0.90 | 0.18           |
| HUVEC     | EE/P   | Decision Tree | 949  | 37460 | 1140  | 983  | 0.73 | 0.44  | 0.55 | 0.47           |
| HUVEC     | E/P    | Baseline      | 746  | 15180 | 15220 | 778  | 0.49 | -0.00 | 0.95 | 0.09           |
| HUVEC     | E/P    | Boosted Trees | 604  | 30035 | 365   | 920  | 0.69 | 0.48  | 0.38 | 0.48           |
| HUVEC     | E/P    | Linear SVM    | 916  | 19848 | 10552 | 608  | 0.63 | 0.11  | 0.92 | 0.14           |
| HUVEC     | E/P    | Decision Tree | 604  | 29432 | 968   | 920  | 0.68 | 0.36  | 0.62 | 0.39           |
| HUVEC     | E/P/W  | Baseline      | 746  | 15180 | 15220 | 778  | 0.49 | -0.00 | 0.95 | 0.09           |
| HUVEC     | E/P/W  | Boosted Trees | 1053 | 30239 | 161   | 471  | 0.84 | 0.76  | 0.13 | 0.77           |
| HUVEC     | E/P/W  | Linear SVM    | 952  | 23857 | 6543  | 572  | 0.70 | 0.21  | 0.87 | 0.21           |
| HUVEC     | E/P/W  | Decision Tree | 836  | 29595 | 805   | 688  | 0.76 | 0.50  | 0.49 | 0.53           |
| HeLa-S3   | EE/P   | Baseline      | 1080 | 21506 | 21394 | 1066 | 0.50 | 0.00  | 0.95 | 0.09           |
| HeLa-S3   | EE/P   | Boosted Trees | 1685 | 42667 | 233   | 461  | 0.89 | 0.82  | 0.12 | 0.83           |
| HeLa-S3   | EE/P   | Linear SVM    | 901  | 38089 | 4811  | 1245 | 0.65 | 0.20  | 0.84 | 0.23           |
| HeLa-S3   | EE/P   | Decision Tree | 1379 | 41850 | 1050  | 767  | 0.81 | 0.58  | 0.43 | 0.60           |
| HeLa-S3   | E/P    | Baseline      | 800  | 17260 | 17540 | 940  | 0.48 | -0.02 | 0.96 | 0.08           |
| HeLa-S3   | E/P    | Boosted Trees | 1020 | 34223 | 577   | 720  | 0.78 | 0.59  | 0.36 | 0.61           |
| HeLa-S3   | E/P    | Linear SVM    | 799  | 28340 | 6460  | 941  | 0.64 | 0.15  | 0.89 | 0.18           |
| HeLa-S3   | E/P    | Decision Tree | 841  | 33874 | 926   | 899  | 0.73 | 0.45  | 0.52 | 0.48           |
| HeLa-S3   | E/P/W  | Baseline      | 800  | 17260 | 17540 | 940  | 0.48 | -0.02 | 0.96 | 0.08           |
| HeLa-S3   | E/P/W  | Boosted Trees | 1473 | 34631 | 169   | 267  | 0.92 | 0.87  | 0.10 | 0.87           |
| HeLa-S3   | E/P/W  | Linear SVM    | 974  | 30116 | 4684  | 766  | 0.71 | 0.25  | 0.83 | 0.26           |
| HeLa-S3   | E/P/W  | Decision Tree | 1240 | 34087 | 713   | 500  | 0.85 | 0.66  | 0.37 | 0.67           |
| IMR90     | EE/P   | Baseline      | 983  | 19033 | 18767 | 914  | 0.51 | 0.01  | 0.95 | 0.09           |

|         |       |               |      |        |        |      |      |       |      |      |
|---------|-------|---------------|------|--------|--------|------|------|-------|------|------|
| IMR90   | EE/P  | Boosted Trees | 1468 | 37647  | 153    | 429  | 0.88 | 0.83  | 0.09 | 0.83 |
| IMR90   | EE/P  | Linear SVM    | 912  | 33224  | 4576   | 985  | 0.68 | 0.22  | 0.83 | 0.25 |
| IMR90   | EE/P  | Decision Tree | 1164 | 36821  | 979    | 733  | 0.79 | 0.55  | 0.46 | 0.58 |
| IMR90   | E/P   | Baseline      | 620  | 12512  | 12488  | 634  | 0.50 | -0.00 | 0.95 | 0.09 |
| IMR90   | E/P   | Boosted Trees | 500  | 24670  | 330    | 754  | 0.69 | 0.47  | 0.40 | 0.48 |
| IMR90   | E/P   | Linear SVM    | 537  | 21300  | 3700   | 717  | 0.64 | 0.16  | 0.87 | 0.20 |
| IMR90   | E/P   | Decision Tree | 491  | 24122  | 878    | 763  | 0.68 | 0.34  | 0.64 | 0.37 |
| IMR90   | E/P/W | Baseline      | 620  | 12512  | 12488  | 634  | 0.50 | -0.00 | 0.95 | 0.09 |
| IMR90   | E/P/W | Boosted Trees | 913  | 24839  | 161    | 341  | 0.86 | 0.78  | 0.15 | 0.78 |
| IMR90   | E/P/W | Linear SVM    | 673  | 22090  | 2910   | 581  | 0.71 | 0.26  | 0.81 | 0.28 |
| IMR90   | E/P/W | Decision Tree | 721  | 24359  | 641    | 533  | 0.77 | 0.53  | 0.47 | 0.55 |
| K562    | EE/P  | Baseline      | 1420 | 27970  | 27030  | 1330 | 0.51 | 0.01  | 0.95 | 0.09 |
| K562    | EE/P  | Boosted Trees | 2074 | 54716  | 284    | 676  | 0.87 | 0.81  | 0.12 | 0.81 |
| K562    | EE/P  | Linear SVM    | 914  | 50718  | 4282   | 1836 | 0.63 | 0.19  | 0.82 | 0.23 |
| K562    | EE/P  | Decision Tree | 1696 | 53542  | 1458   | 1054 | 0.80 | 0.55  | 0.46 | 0.57 |
| K562    | E/P   | Baseline      | 1015 | 19891  | 19609  | 962  | 0.51 | 0.01  | 0.95 | 0.09 |
| K562    | E/P   | Boosted Trees | 1093 | 38996  | 504    | 884  | 0.77 | 0.60  | 0.32 | 0.61 |
| K562    | E/P   | Linear SVM    | 1150 | 27381  | 12119  | 827  | 0.64 | 0.13  | 0.91 | 0.15 |
| K562    | E/P   | Decision Tree | 925  | 38316  | 1184   | 1052 | 0.72 | 0.42  | 0.56 | 0.45 |
| K562    | E/P/W | Baseline      | 1015 | 19891  | 19609  | 962  | 0.51 | 0.01  | 0.95 | 0.09 |
| K562    | E/P/W | Boosted Trees | 1604 | 39296  | 204    | 373  | 0.90 | 0.84  | 0.11 | 0.85 |
| K562    | E/P/W | Linear SVM    | 754  | 35541  | 3959   | 1223 | 0.64 | 0.19  | 0.84 | 0.23 |
| K562    | E/P/W | Decision Tree | 1359 | 38631  | 869    | 618  | 0.83 | 0.63  | 0.39 | 0.65 |
| NHEK    | EE/P  | Baseline      | 836  | 15549  | 15451  | 723  | 0.52 | 0.02  | 0.95 | 0.09 |
| NHEK    | EE/P  | Boosted Trees | 1226 | 30823  | 177    | 333  | 0.89 | 0.82  | 0.13 | 0.83 |
| NHEK    | EE/P  | Linear SVM    | 777  | 23466  | 7534   | 782  | 0.63 | 0.13  | 0.91 | 0.16 |
| NHEK    | EE/P  | Decision Tree | 979  | 30164  | 836    | 580  | 0.80 | 0.56  | 0.46 | 0.58 |
| NHEK    | E/P   | Baseline      | 609  | 12904  | 12696  | 682  | 0.49 | -0.01 | 0.95 | 0.08 |
| NHEK    | E/P   | Boosted Trees | 702  | 25223  | 377    | 589  | 0.76 | 0.58  | 0.35 | 0.59 |
| NHEK    | E/P   | Linear SVM    | 642  | 16769  | 8831   | 649  | 0.58 | 0.07  | 0.93 | 0.12 |
| NHEK    | E/P   | Decision Tree | 574  | 24844  | 756    | 717  | 0.71 | 0.41  | 0.57 | 0.44 |
| NHEK    | E/P/W | Baseline      | 609  | 12904  | 12696  | 682  | 0.49 | -0.01 | 0.95 | 0.08 |
| NHEK    | E/P/W | Boosted Trees | 1121 | 25507  | 93     | 170  | 0.93 | 0.89  | 0.08 | 0.90 |
| NHEK    | E/P/W | Linear SVM    | 867  | 19067  | 6533   | 424  | 0.71 | 0.20  | 0.88 | 0.20 |
| NHEK    | E/P/W | Decision Tree | 962  | 25122  | 478    | 329  | 0.86 | 0.69  | 0.33 | 0.70 |
| 4 Lines | EE/P  | Baseline      | 5149 | 102855 | 103945 | 5203 | 0.50 | -0.00 | 0.95 | 0.09 |
| 4 Lines | EE/P  | Boosted Trees | 8299 | 203595 | 3205   | 2053 | 0.89 | 0.75  | 0.28 | 0.76 |
| 4 Lines | EE/P  | Linear SVM    | 5422 | 168799 | 38001  | 4930 | 0.67 | 0.18  | 0.88 | 0.20 |
| 4 Lines | EE/P  | Decision Tree | 5993 | 201092 | 5708   | 4359 | 0.78 | 0.52  | 0.49 | 0.54 |

|         |       |               |      |        |       |      |      |       |      |      |
|---------|-------|---------------|------|--------|-------|------|------|-------|------|------|
| 4 Lines | E/P   | Baseline      | 3536 | 70482  | 71018 | 3548 | 0.50 | -0.00 | 0.95 | 0.09 |
| 4 Lines | E/P   | Boosted Trees | 4340 | 137646 | 3854  | 2744 | 0.79 | 0.55  | 0.47 | 0.57 |
| 4 Lines | E/P   | Linear SVM    | 3642 | 99030  | 42470 | 3442 | 0.61 | 0.10  | 0.92 | 0.14 |
| 4 Lines | E/P   | Decision Tree | 2733 | 136578 | 4922  | 4351 | 0.68 | 0.34  | 0.64 | 0.37 |
| 4 Lines | E/P/W | Baseline      | 3536 | 70482  | 71018 | 3548 | 0.50 | -0.00 | 0.95 | 0.09 |
| 4 Lines | E/P/W | Boosted Trees | 5408 | 140413 | 1087  | 1676 | 0.88 | 0.79  | 0.17 | 0.80 |
| 4 Lines | E/P/W | Linear SVM    | 4303 | 105061 | 36439 | 2781 | 0.67 | 0.17  | 0.89 | 0.18 |
| 4 Lines | E/P/W | Decision Tree | 3831 | 137256 | 4244  | 3253 | 0.76 | 0.48  | 0.53 | 0.51 |

Supplementary Table 3: **TargetFinder performance on held out data.** Counts of true and false positives and negatives are given for each classifier and cell line, as well as several summary metrics including area under the ROC curve, Matthews correlation coefficient ( $\phi$ ), and a balance of precision and recall ( $F_1$ ). Performance was measured separately for classifiers using features at enhancer and promoter loci (E/P), features at extended enhancer (+/- 3 Kb) and promoter loci (EE/P), and features using the full window between enhancer and promoter in addition to the enhancer and promoter loci themselves (E/P/W). This table demonstrates the importance of binding activity outside the enhancer and promoter for accurate prediction of interactions, and that much of this activity occurs in a relatively small region around the enhancer – though the complete window typically maximizes performance. Baseline performance was estimated by generating random predictions from the empirical distribution of class labels.

## Supplemental Figures

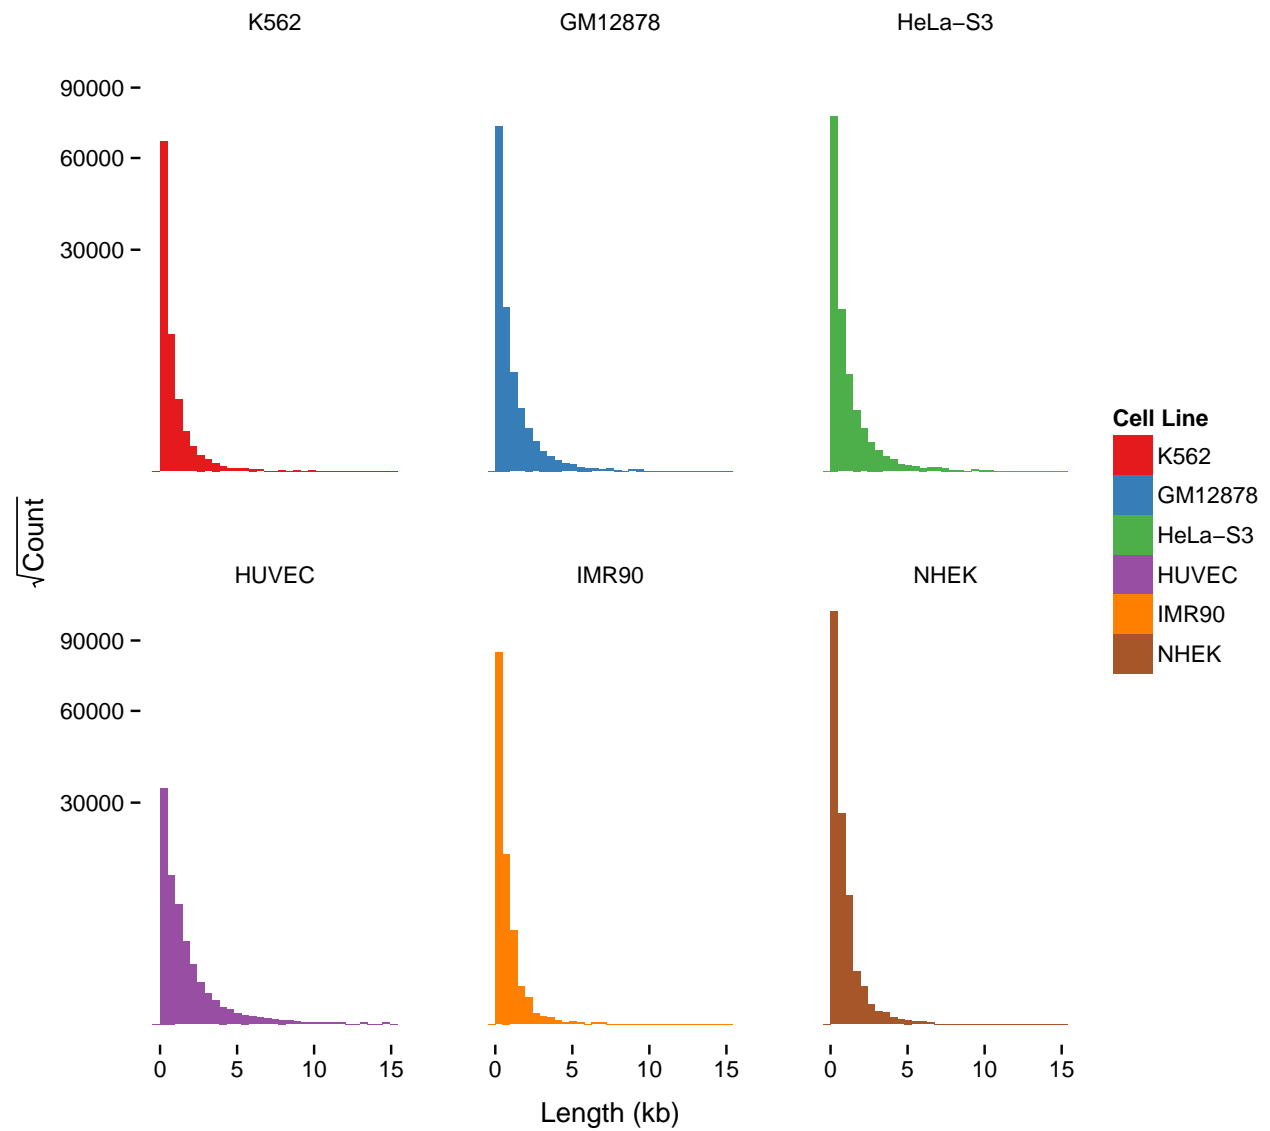

Supplementary Figure 1: Distribution of active enhancer lengths for each cell line.

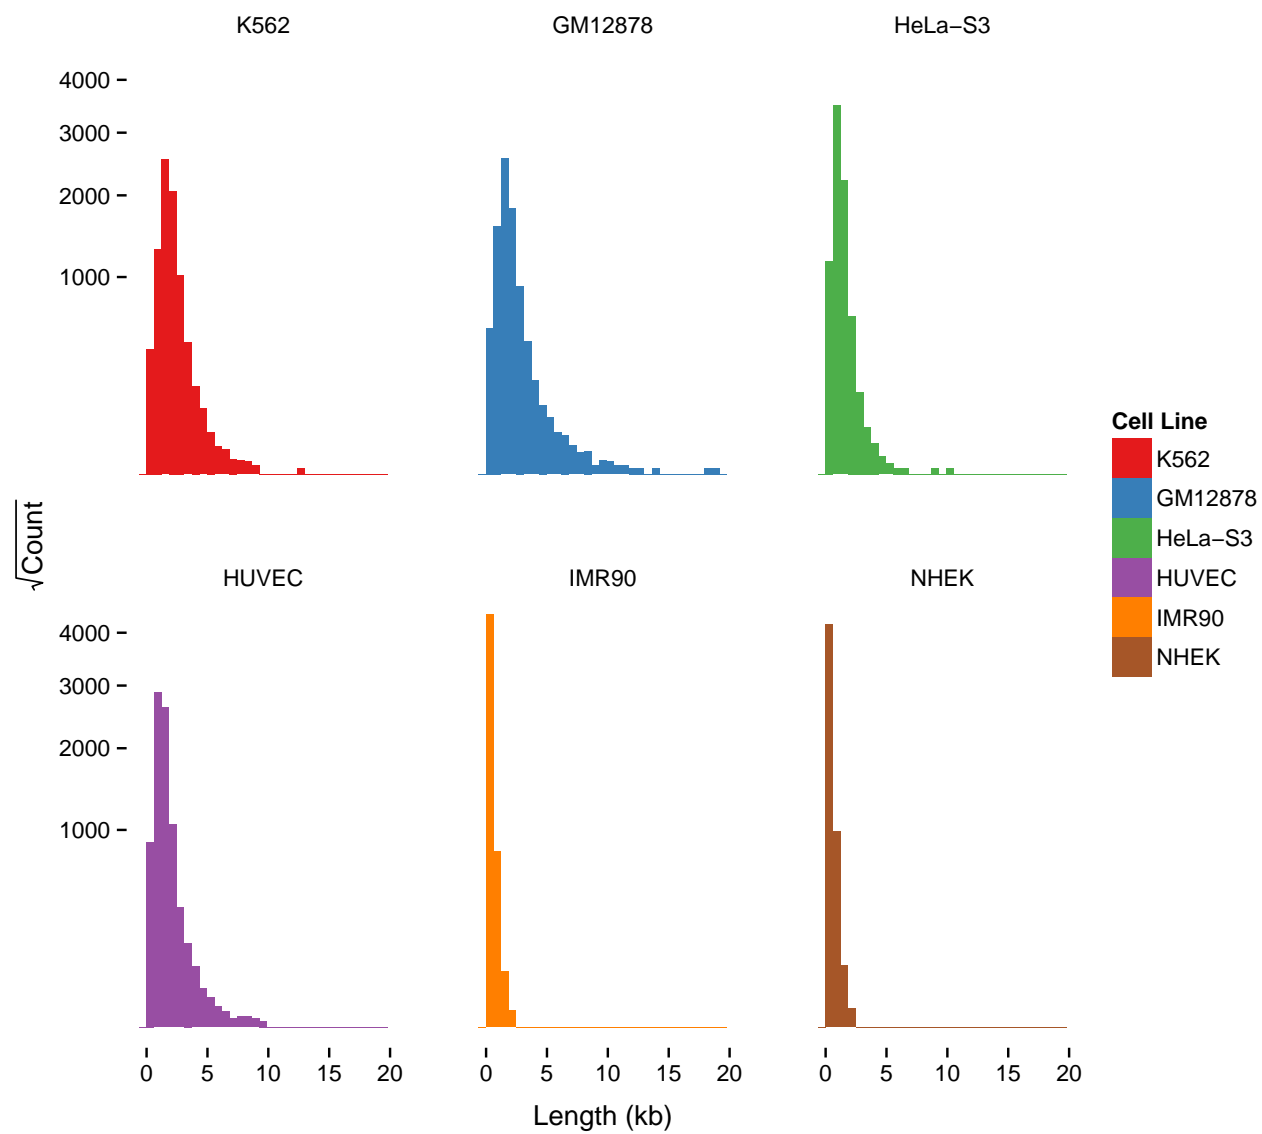

Supplementary Figure 2: Distribution of active promoter lengths for each cell line.

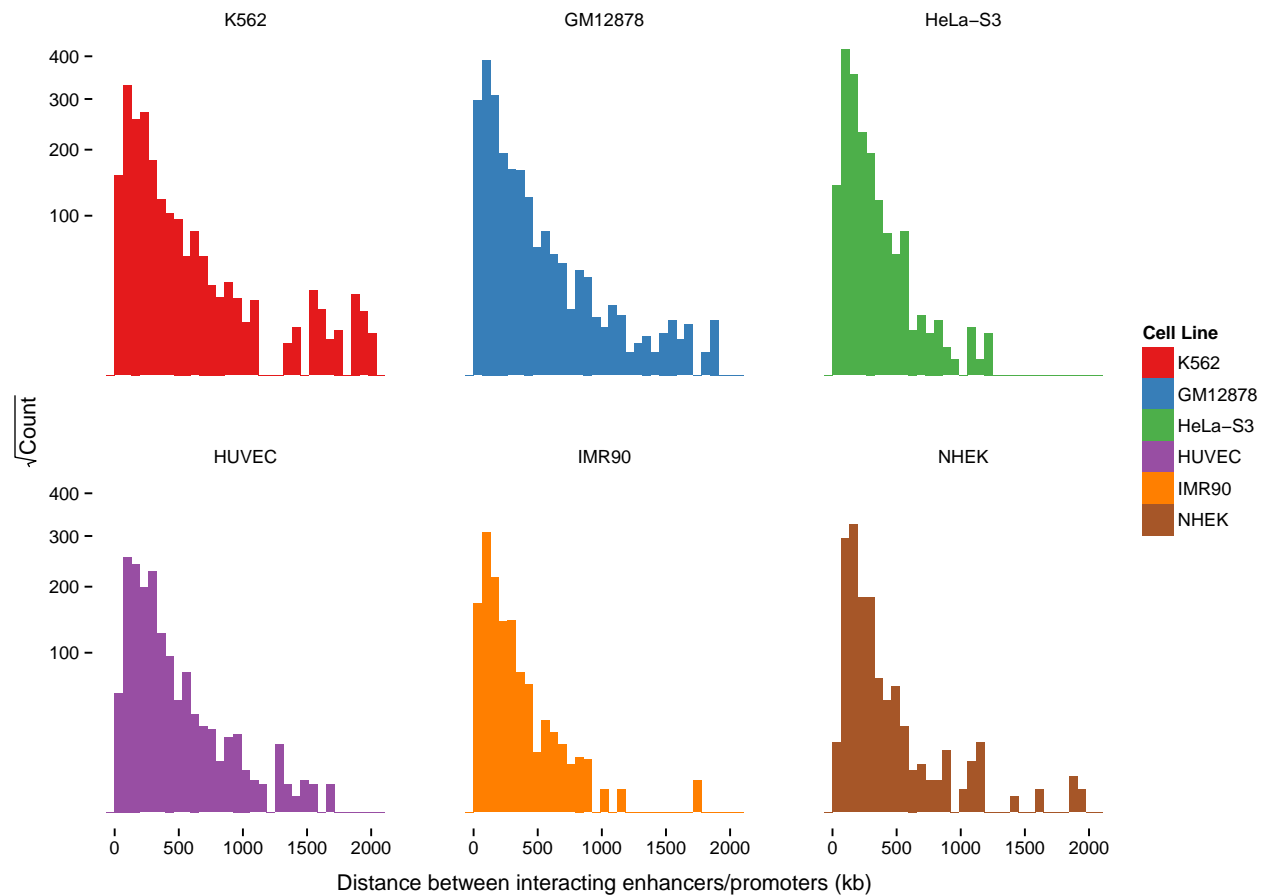

Supplementary Figure 3: Distribution of genomic distance between interacting enhancers and promoters for each cell line.

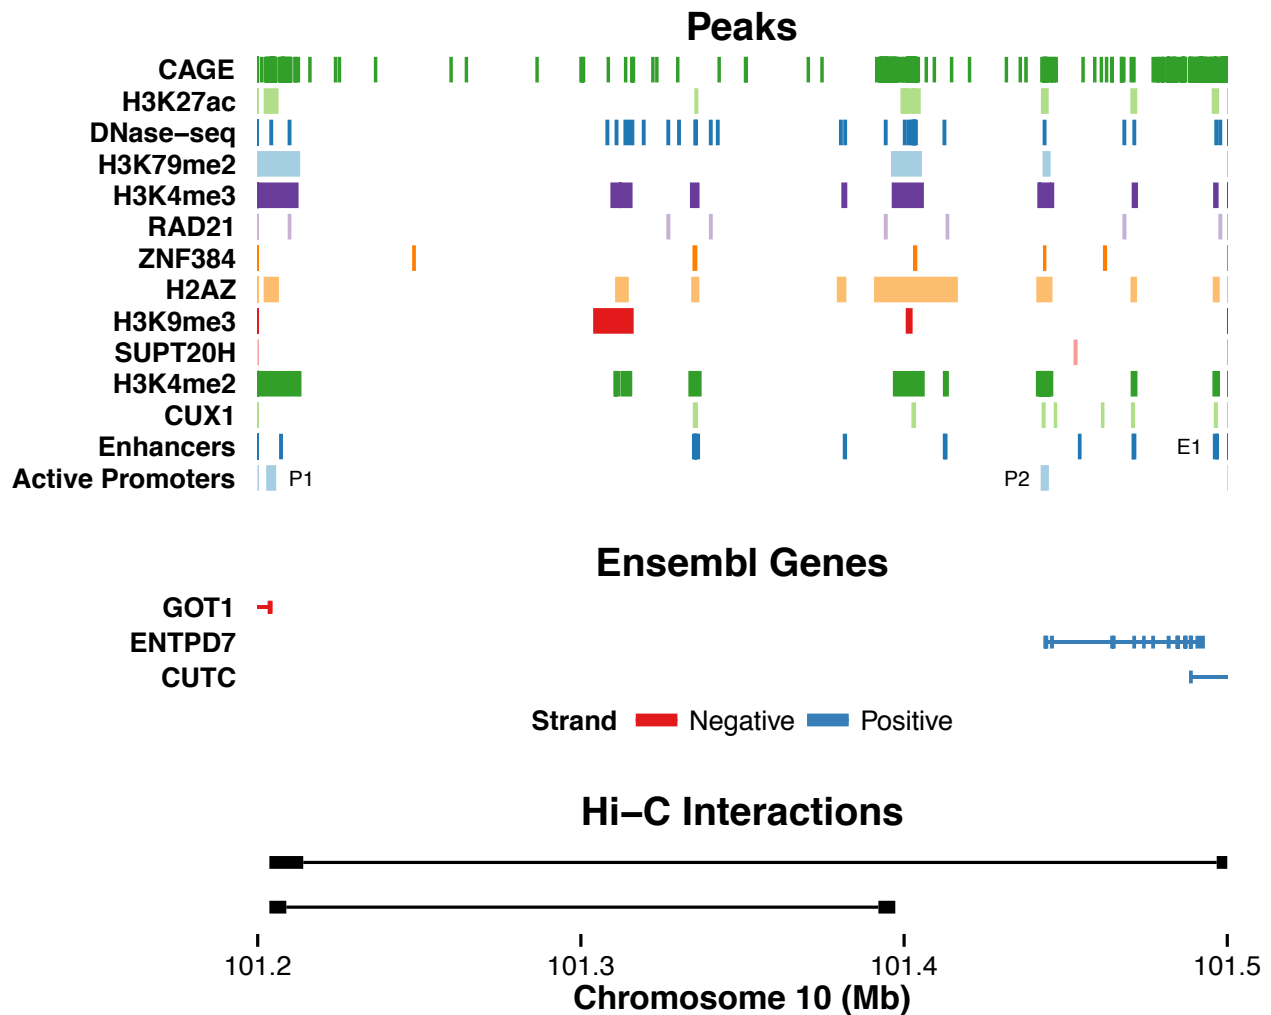

Supplementary Figure 4: Significant peaks for the top 12 predictive datasets of an interacting promoter (P1) and enhancer (E1) in GM12878, separated by other active promoters and enhancers. Active enhancers are segments marked “E” by combined ChromHMM/Segway annotations, and active promoters are segments marked “TSS” and expressed in GM12878 with RPKM > 0.3. Ensembl genes are also displayed, with introns denoted as thin lines and exons as squares. Left and right fragments of the Hi-C assay are also shown to visually confirm E1 interacts with P1. This figure demonstrates the potential complexities of interpreting interactions. First, note that P1 is the target of multiple regulatory elements, one of which was not classified by ChromHMM/Segway as an active enhancer. This regulatory element lacks a RAD21 peak commonly associated with looping and also has a heterochromatin-associated H3K9me3 mark. However, RAD21 is not always present at looping interactions, and H3K9me3 is also associated with activation in cancer cells [10]. Second, note that E1 is an intronic enhancer, existing within the CUTC gene but interacting with P1 via long-range looping. Finally, note that non-target P2 lacks RAD21 but otherwise has many activation-associated marks. Thus, the looping interaction of an enhancer and promoter is defined by the complex interplay of protein binding and other features that often cannot be explained by the presence or absence of a single feature.

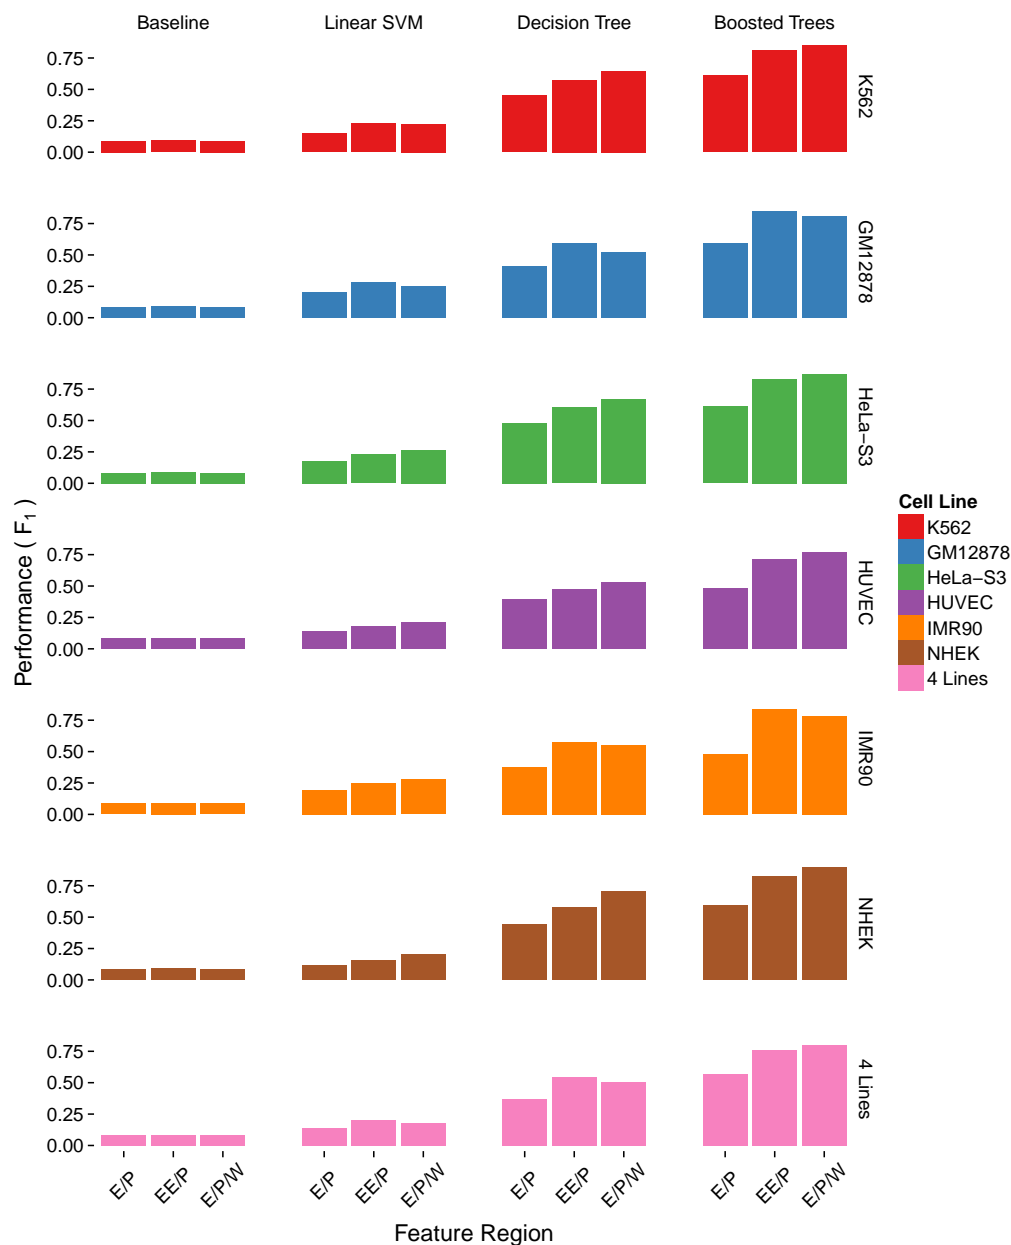

Supplementary Figure 5: **Held-out performance by cell line, model type, and region.** Performance was measured separately for classifiers using features at enhancer and promoter loci (E/P), features at extended enhancer (+/- 3 Kb) and promoter loci (EE/P), and features using the full “window” between enhancer and promoter in addition to the enhancer and promoter loci themselves (E/P/W). This figure demonstrates the importance of capturing feature interactions, as well as binding activity outside the enhancer and promoter. Much of the relevant activity flanks the enhancer, though use of the complete window typically maximizes performance. Baseline performance was estimated by generating random predictions from the empirical distribution of class labels. Reported performance is a balance of precision and recall (F<sub>1</sub>) averaged over 10 cross-validation folds.



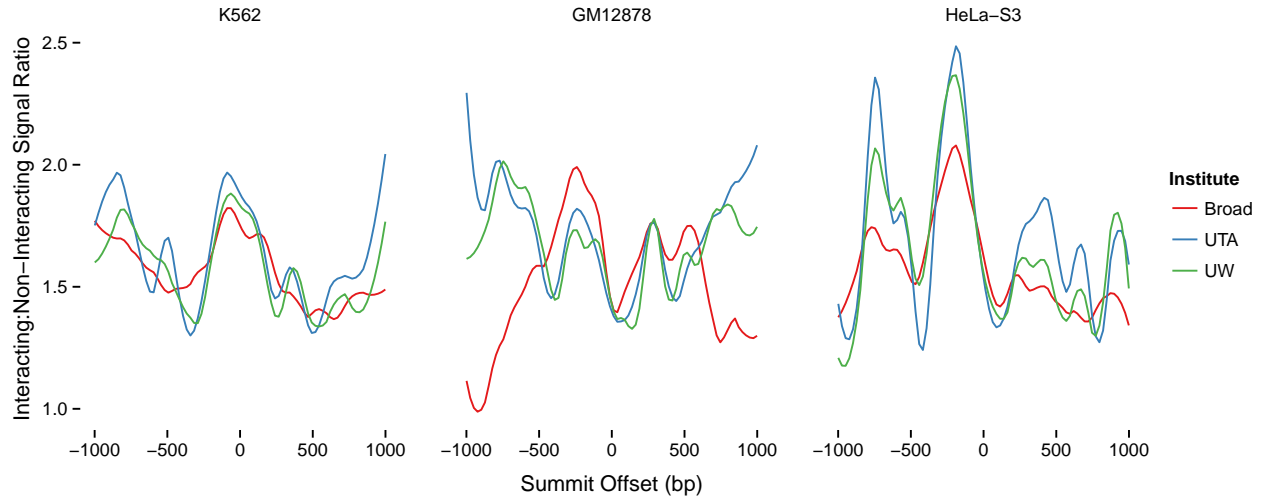

Supplementary Figure 6: Consistency of CTCF ChIP-seq signals performed at 3 different institutions across 3 ENCODE cell lines. Signals are centered at transcription start sites and displayed as the ratio of signal at interacting vs non-interacting sites. This figure shows how variability between, and even within, cell lines contributes to the difficulty of using a model trained on one cell line to predict interactions in another.

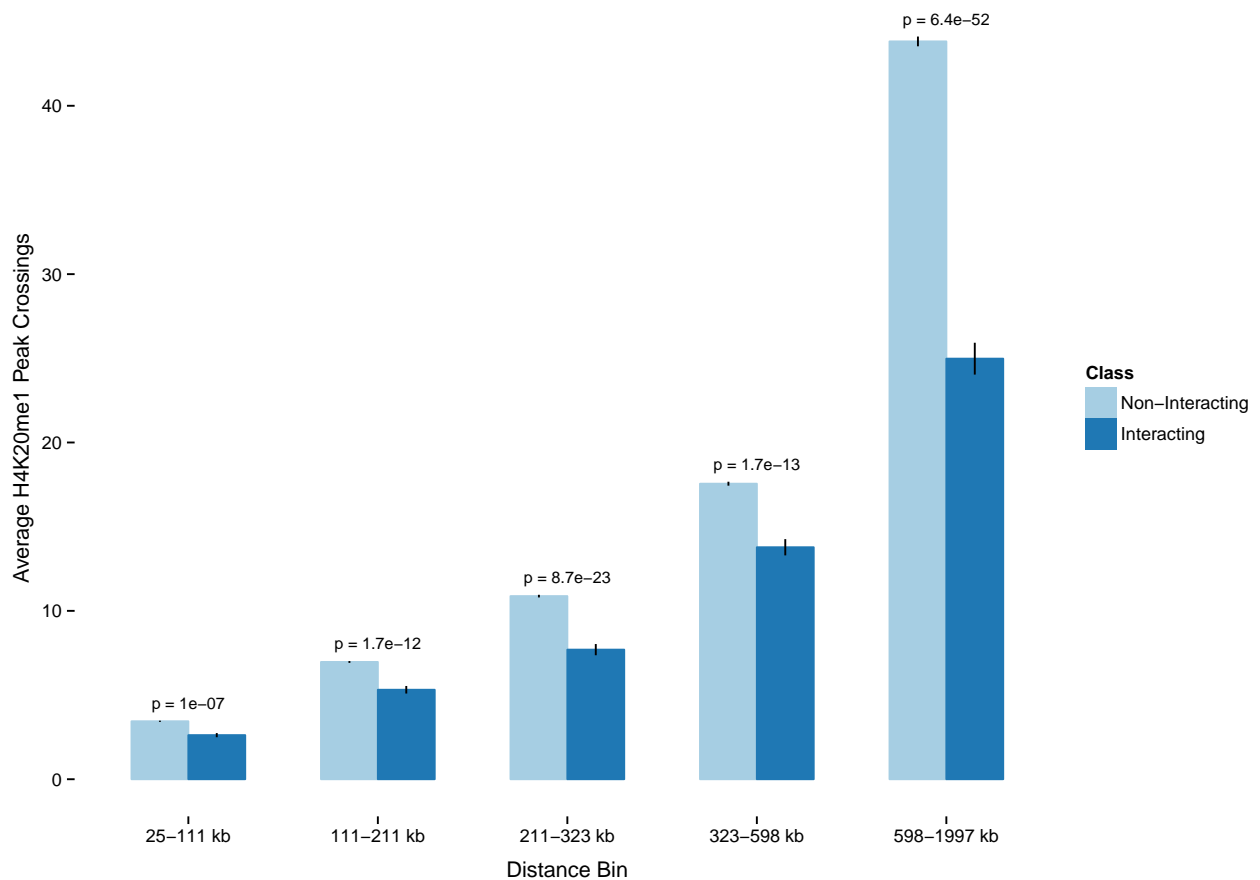

Supplementary Figure 7: Average number of H4K20me1 peaks crossed by interacting and non-interacting enhancer-promoter pairs, grouped by distance bin. The difference in mean number of crossings is significant for each distance bin (two-sample Wilcoxon test) and increases for more distal pairs. This shows repression-associated heterochromatin is depleted in the window of interacting enhancer-promoter pairs.

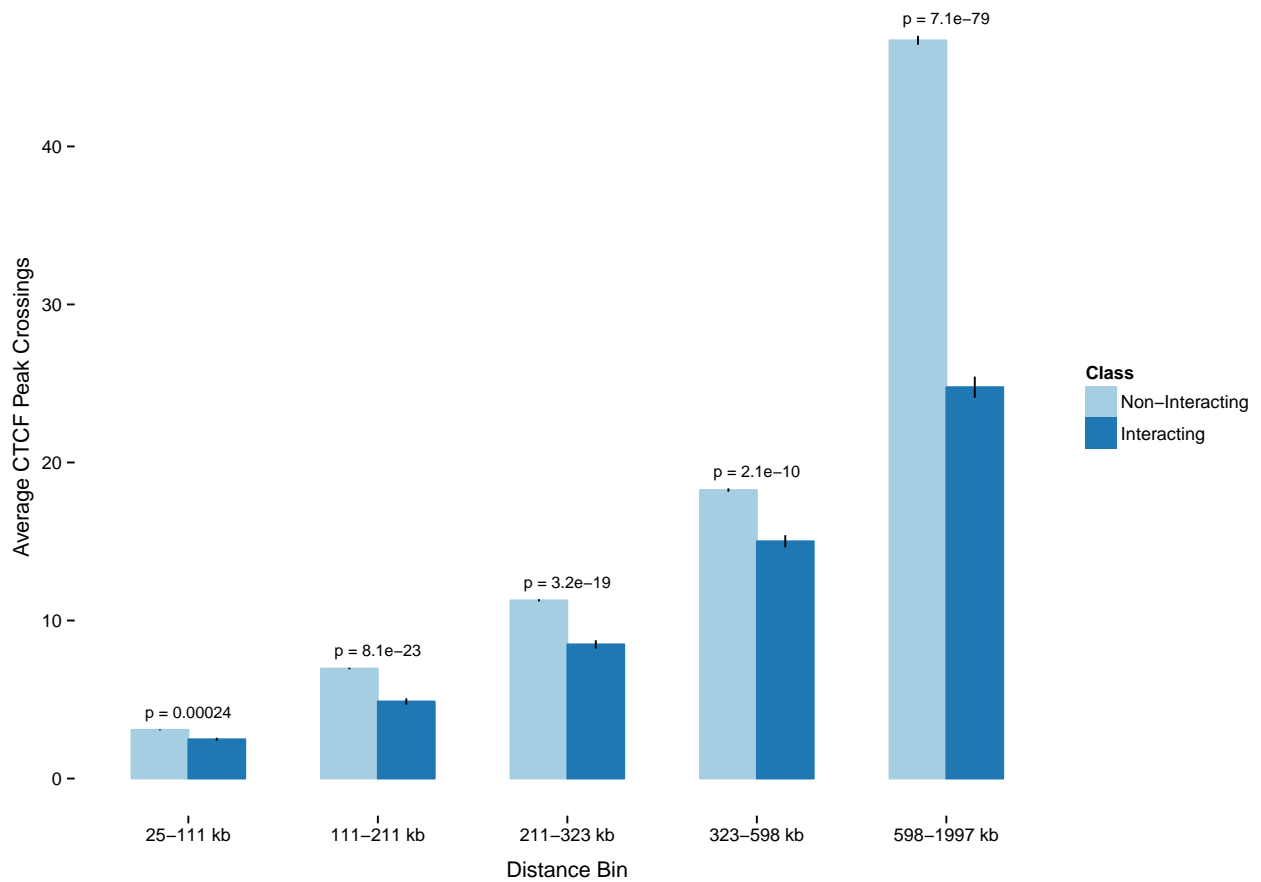

Supplementary Figure 8: Average number of CTCF peak summits crossed by interacting and non-interacting enhancer-promoter pairs, grouped by distance bin. The difference in mean number of crossings is significant for each distance bin (two-sample Wilcoxon test) and increases for more distal pairs. This reinforces current evidence that interactions preferentially occur within TADs or contact domains demarcated by CTCF acting as an insulator to prevent spurious enhancer-promoter interactions.

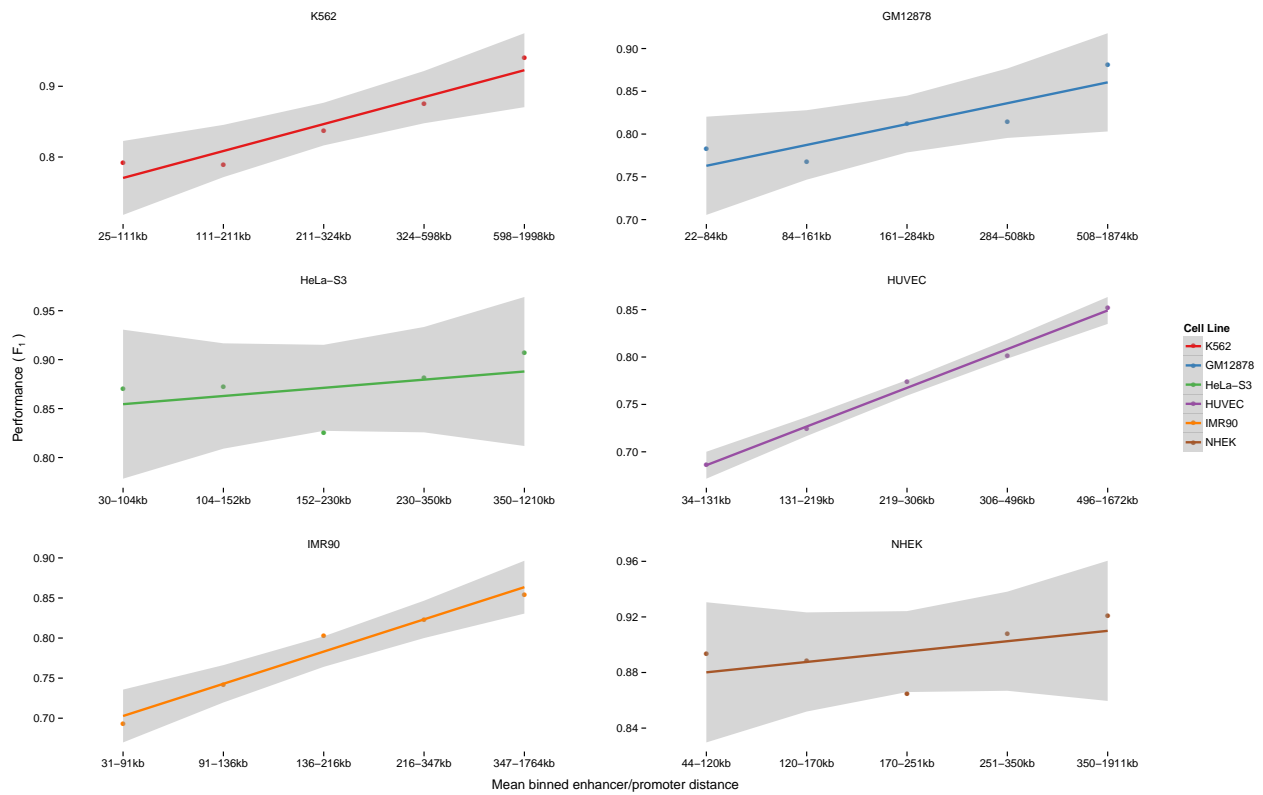

Supplementary Figure 9: Performance as a function of distance between enhancer and promoter. Samples are assigned to distance bins such that each bin has an equal number of interacting pairs. Performance is often higher for extremely distal interaction bins since TAD boundaries reduce the probability of interaction, and such boundaries are more likely to occur within the window between distal enhancer-promoter pairs. (Error bars = 95% c.i.)

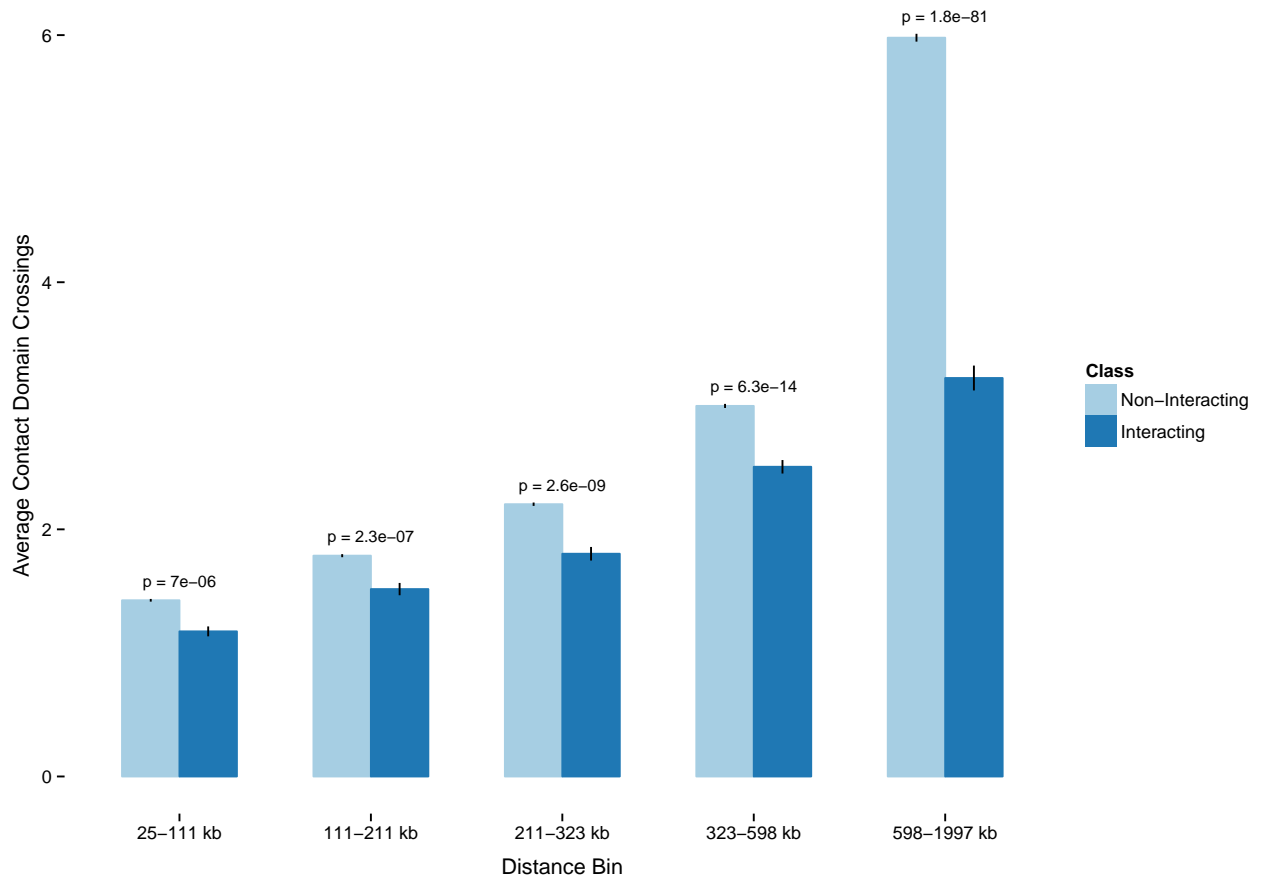

Supplementary Figure 10: Average number of contact domains (estimated by the arrowhead algorithm of Rao et al. [1]) crossed by interacting and non-interacting enhancer-promoter pairs, grouped by distance bin. The difference in mean number of crossings is significant for each distance bin (two-sample Wilcoxon test) and increases for more distal pairs.

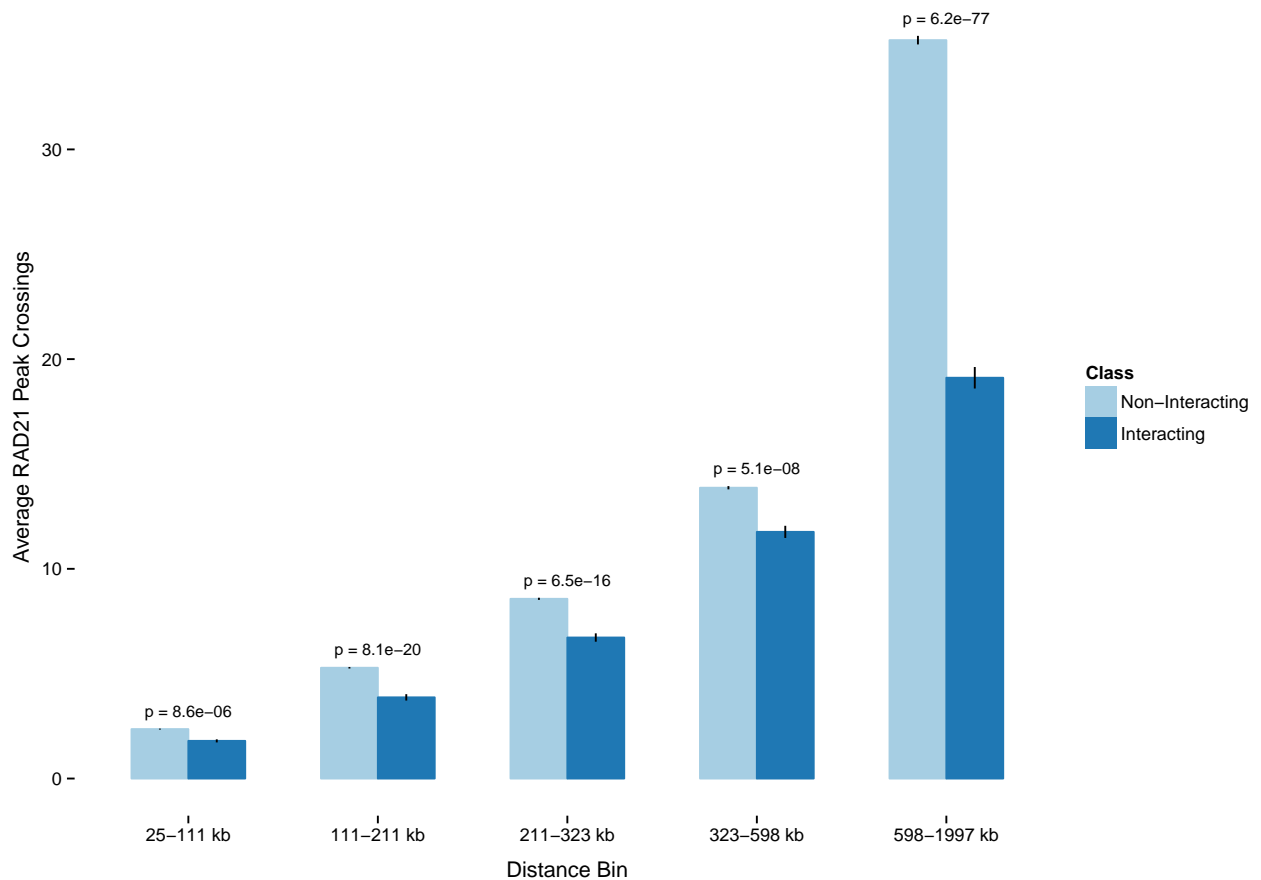

Supplementary Figure 11: Average number of RAD21 peak summits crossed by interacting and non-interacting enhancer-promoter pairs, grouped by distance bin. The difference in mean number of crossings is significant for each distance bin (two-sample Wilcoxon test) and increases for more distal pairs. This suggests looping interactions within the window of a candidate enhancer-promoter pair act as a kind of insulator that decreases the likelihood of interaction.

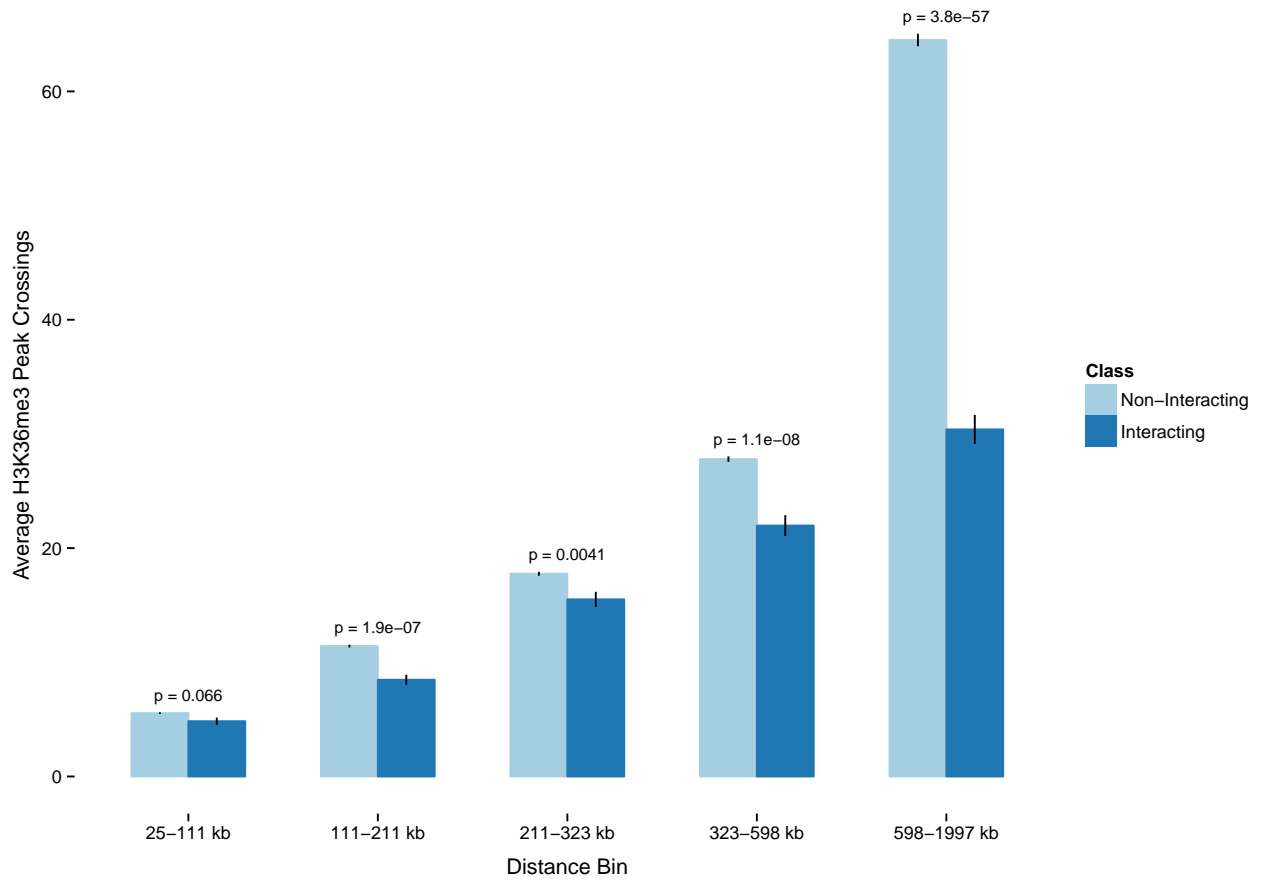

Supplementary Figure 12: Average number of H3K36me3 peaks crossed by interacting and non-interacting enhancer-promoter pairs, grouped by distance bin. The difference in mean number of crossings is significant for all but the first distance bin (two-sample Wilcoxon test) and increases for more distal pairs. This suggests elongation within the window of a candidate enhancer-promoter pair decreases the likelihood of interaction.

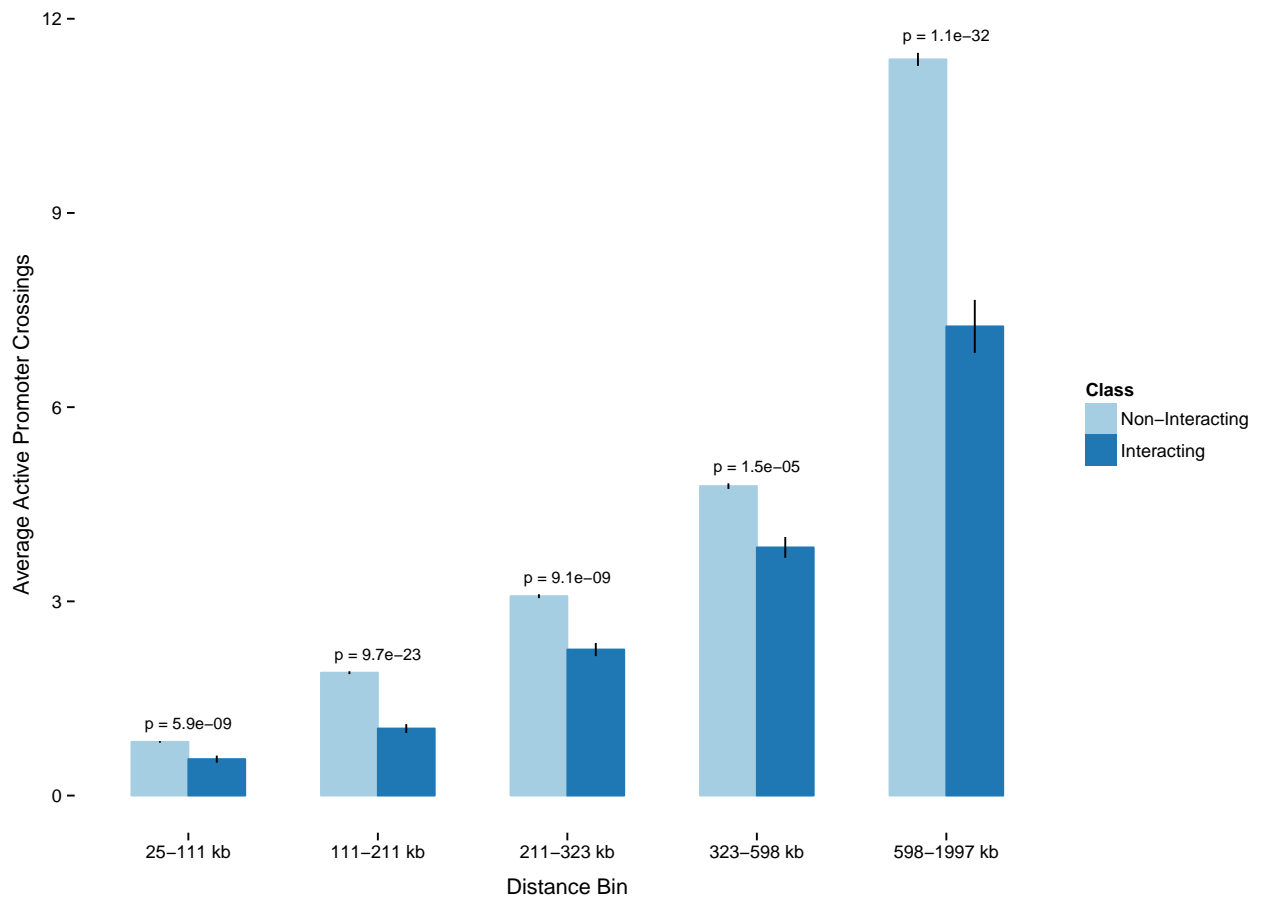

Supplementary Figure 13: Average number of active promoters crossed by interacting and non-interacting enhancer-promoter pairs, grouped by distance bin. The difference in mean number of crossings is significant for each distance bin (two-sample Wilcoxon test) and increases for more distal pairs. Active promoters within the window of a candidate interaction offer alternate targets for the enhancer and thus decrease the likelihood of interaction.

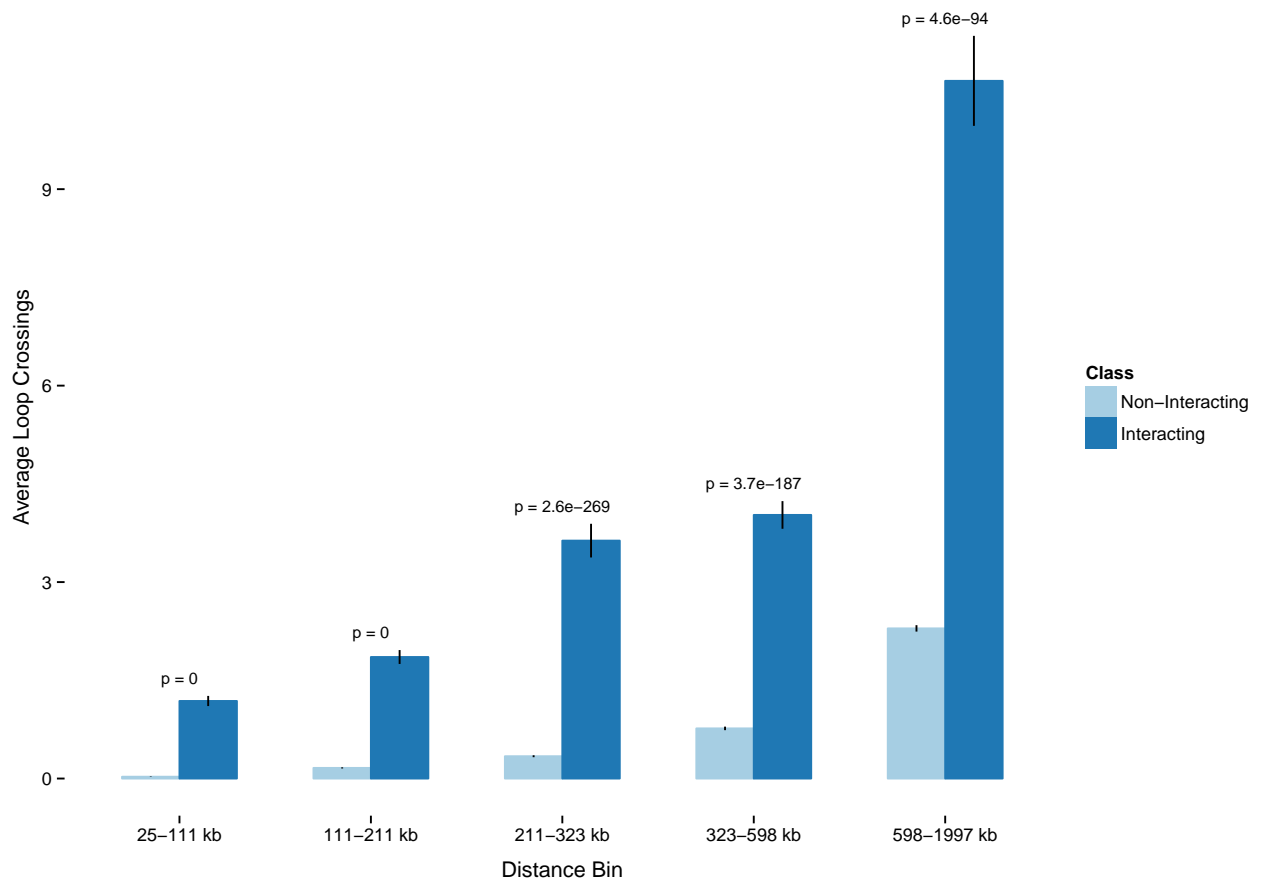

Supplementary Figure 14: Average number of looping interactions crossed by interacting and non-interacting enhancer-promoter pairs, grouped by distance bin. The difference in mean number of crossings is significant for each distance bin (two-sample Wilcoxon test) and increases for more distal pairs. This supports the idea that interactions are enriched within TADs or contact domains and that window features may be a proxy for such domains.



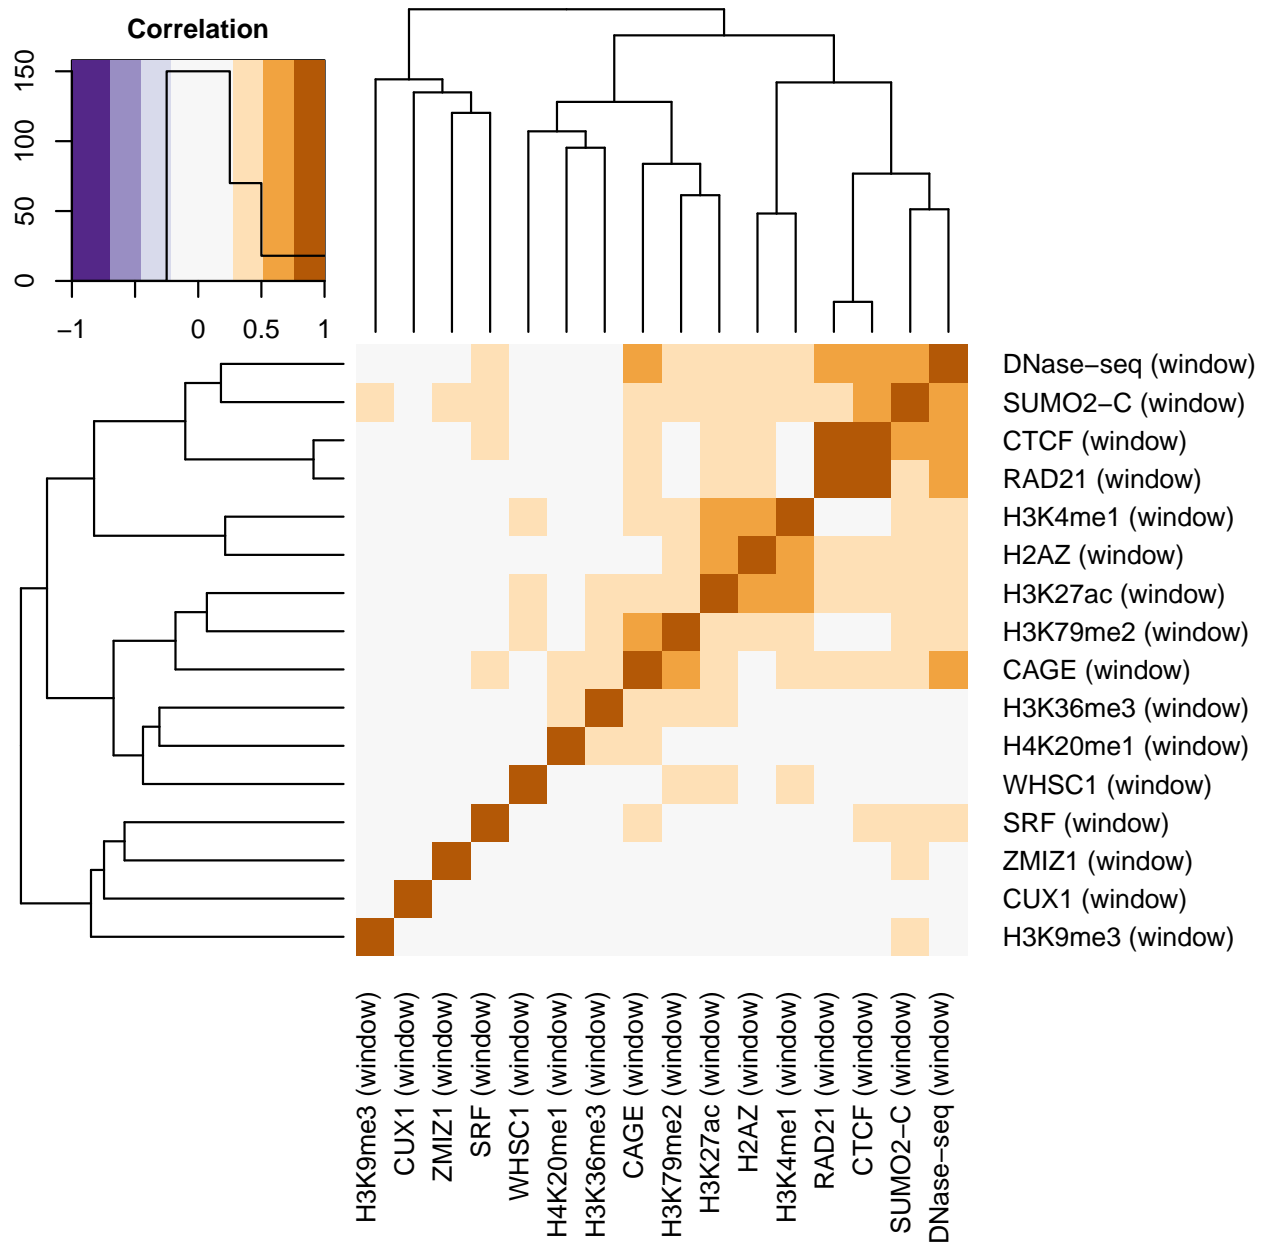

Supplementary Figure 15: Cluster heatmap of the correlation between the top 16 predictive features for K562.

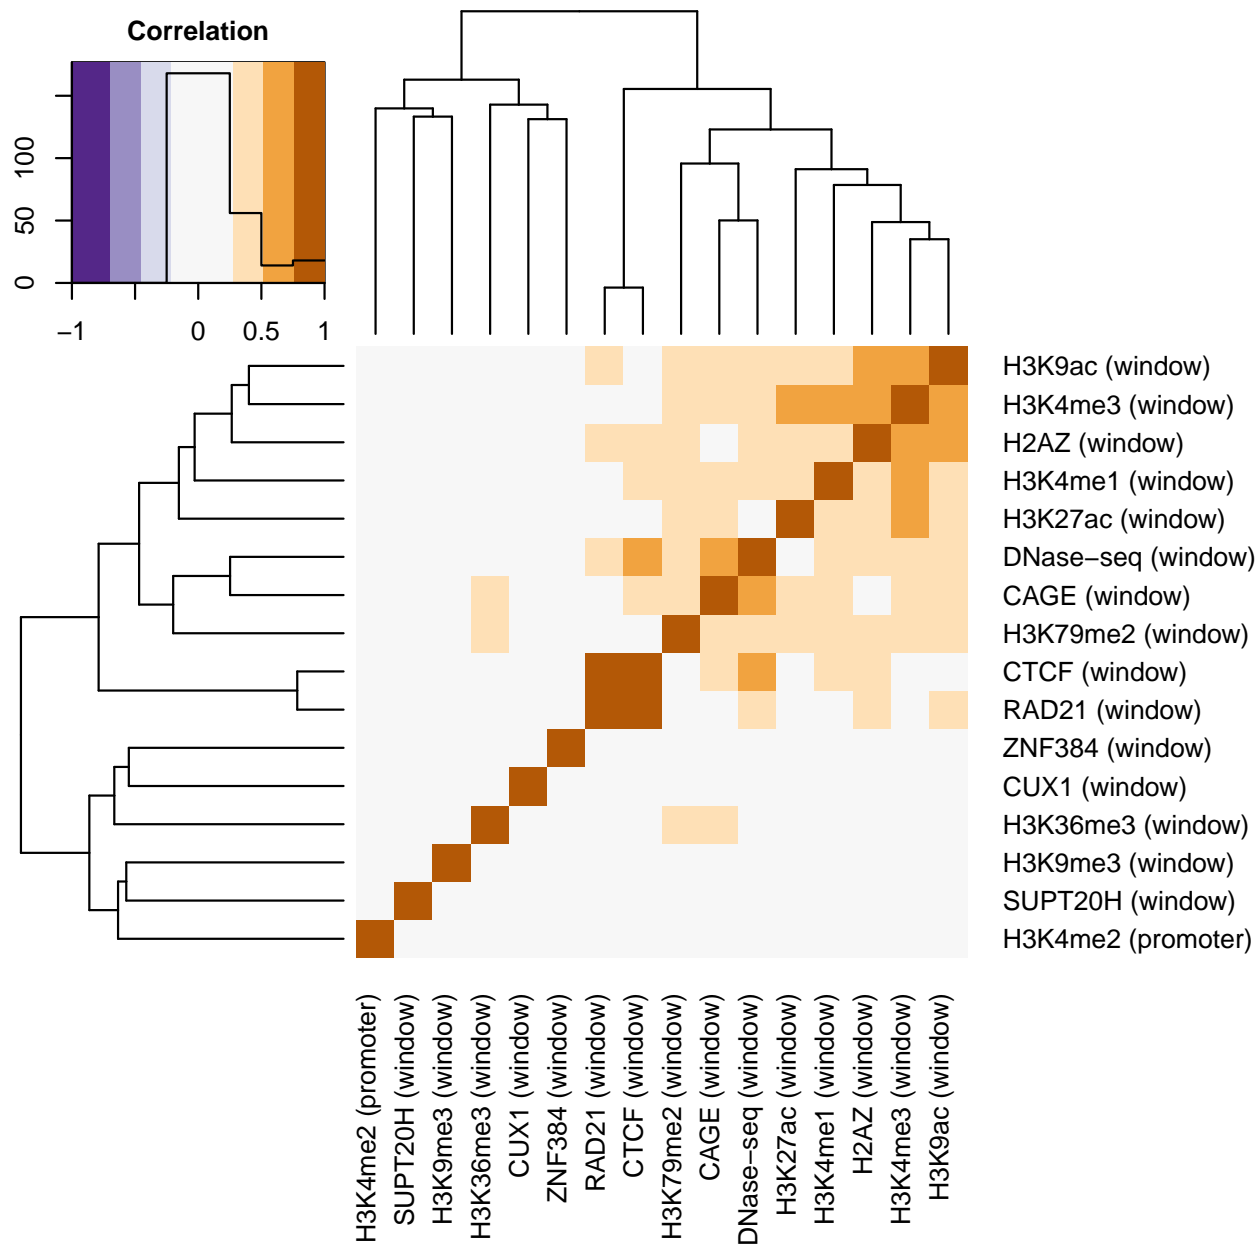

Supplementary Figure 16: Cluster heatmap of the correlation between the top 16 predictive features for GM12878.

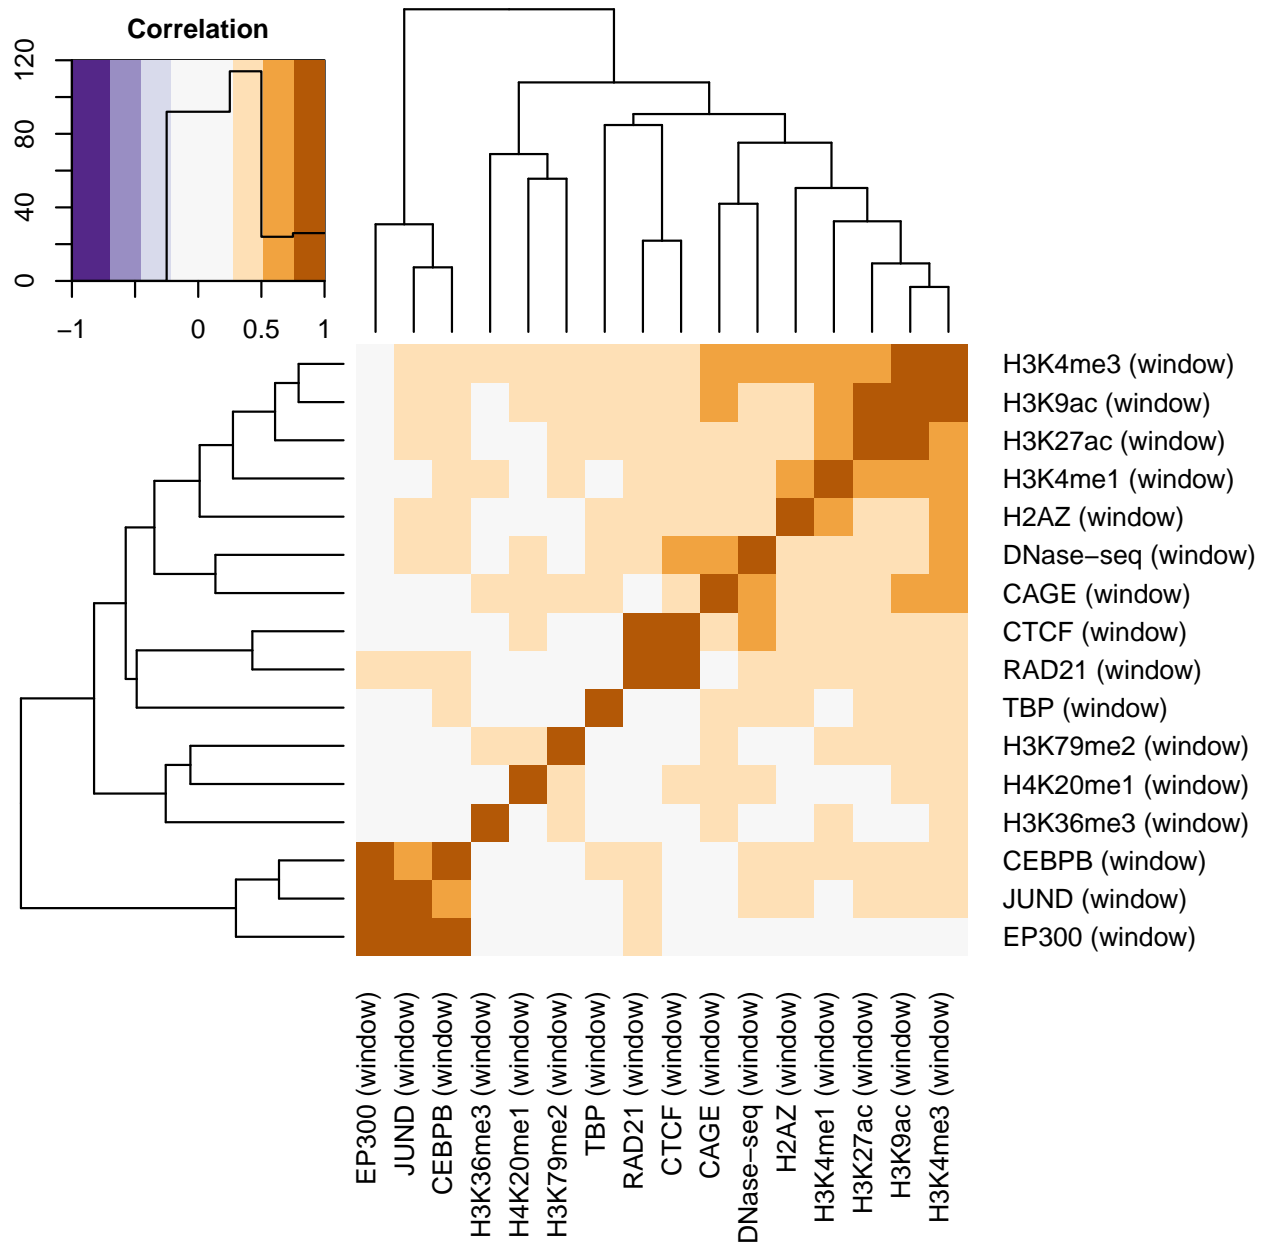

Supplementary Figure 17: Cluster heatmap of the correlation between the top 16 predictive features for HeLa-S3.

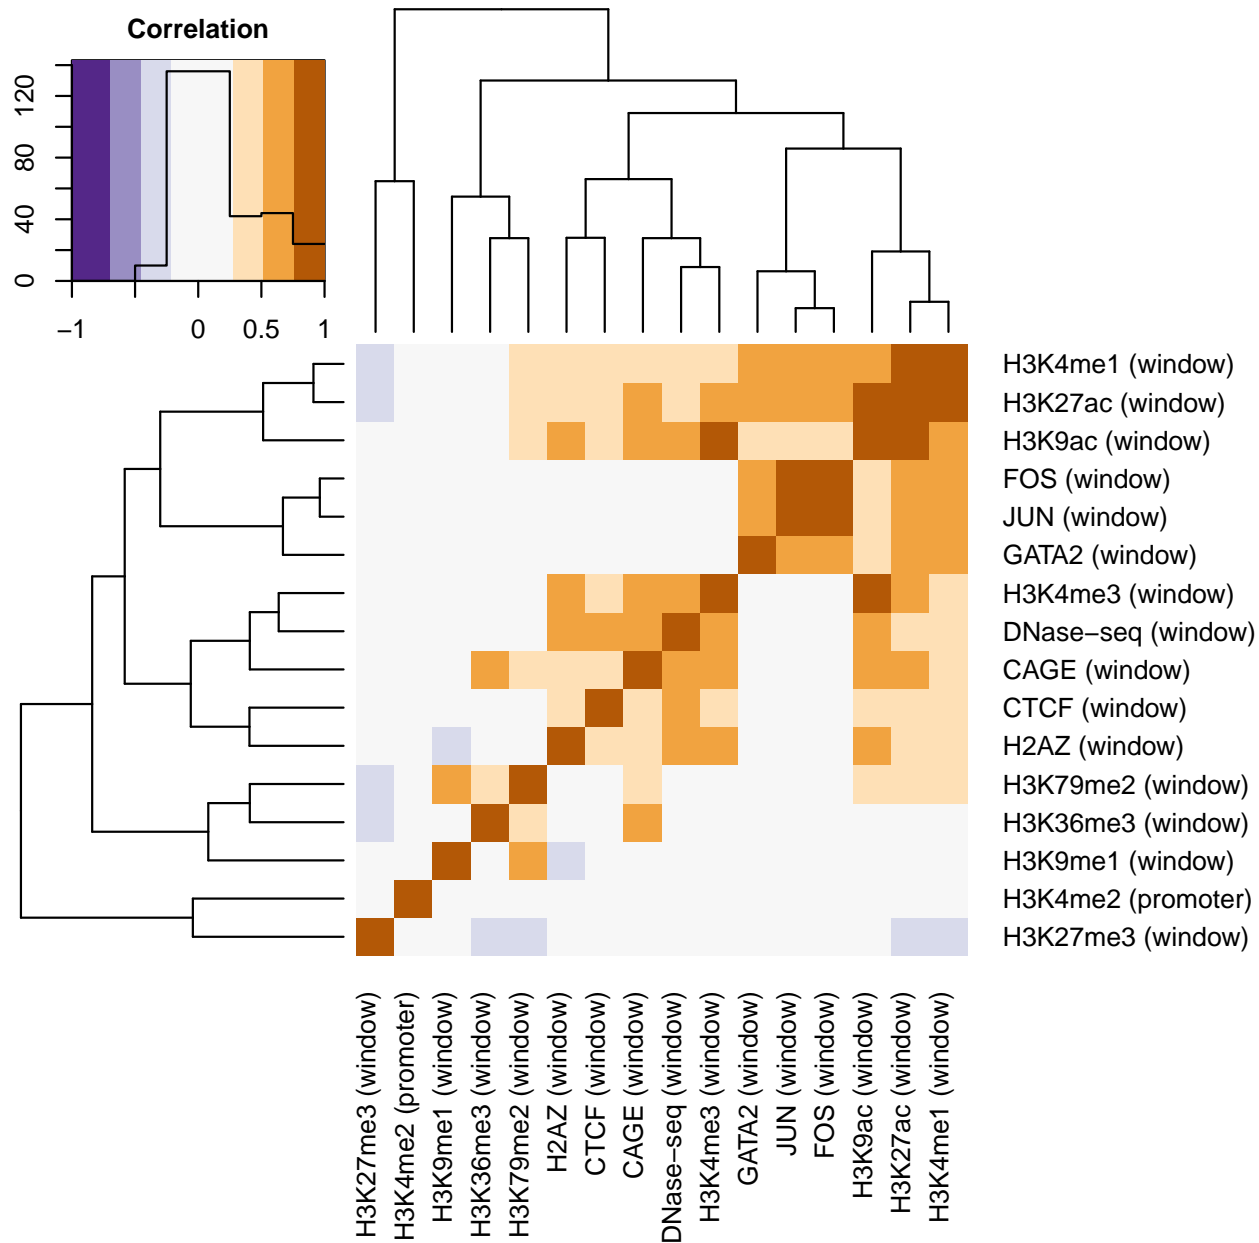

Supplementary Figure 18: Cluster heatmap of the correlation between the top 16 predictive features for HUVEC.

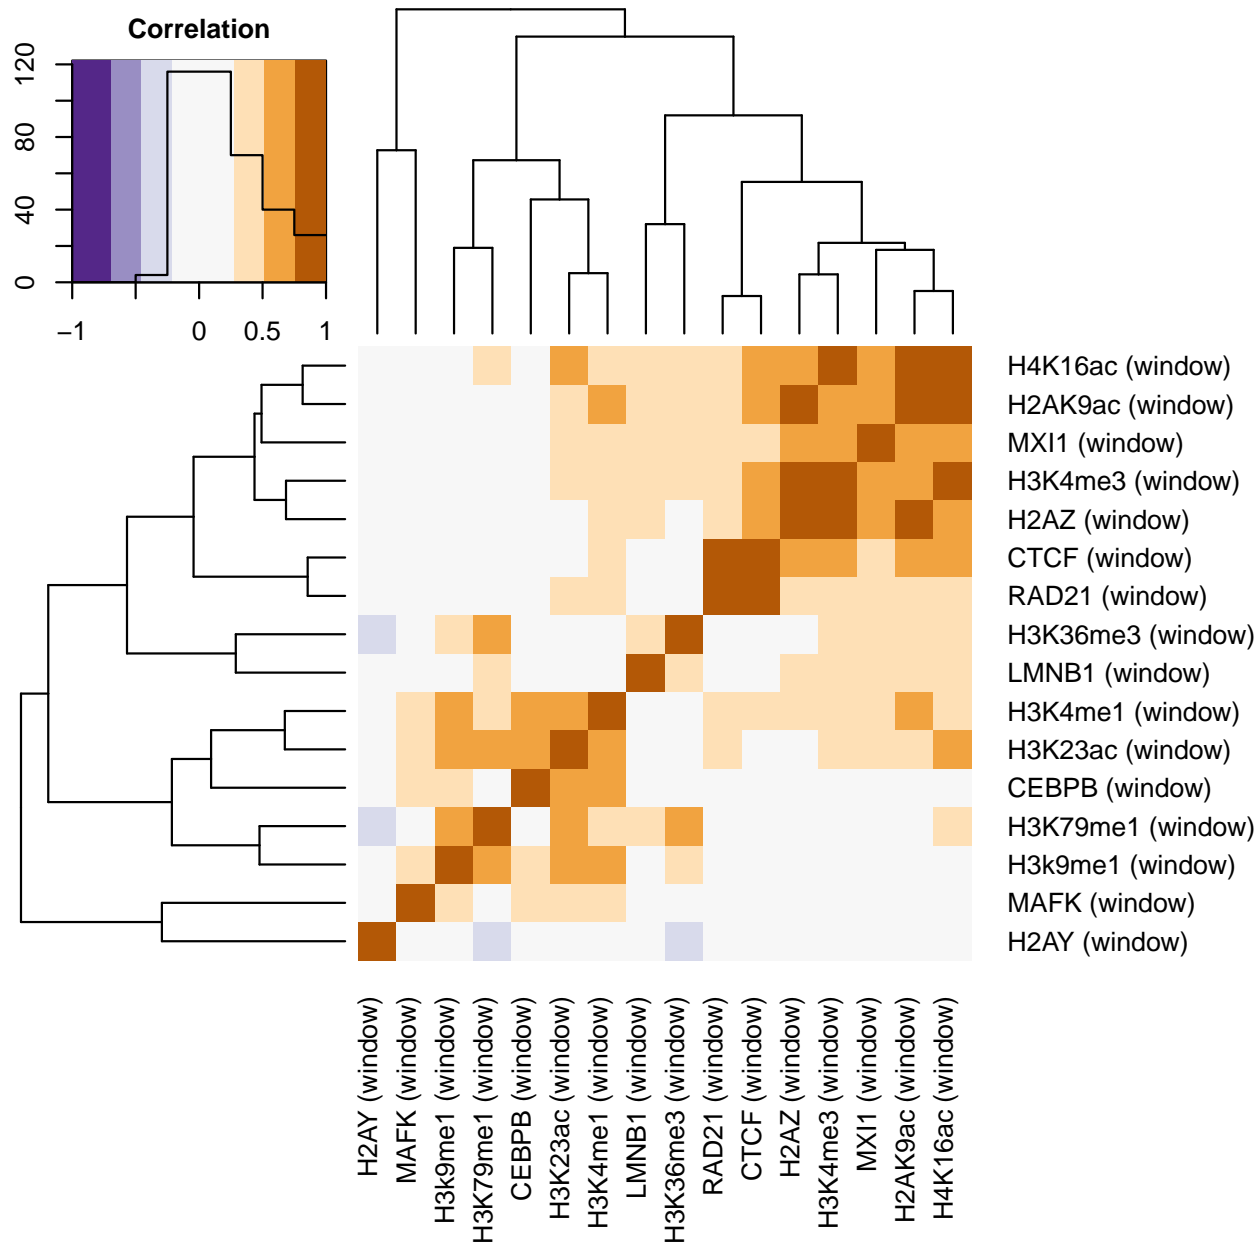

Supplementary Figure 19: Cluster heatmap of the correlation between the top 16 predictive features for IMR90.

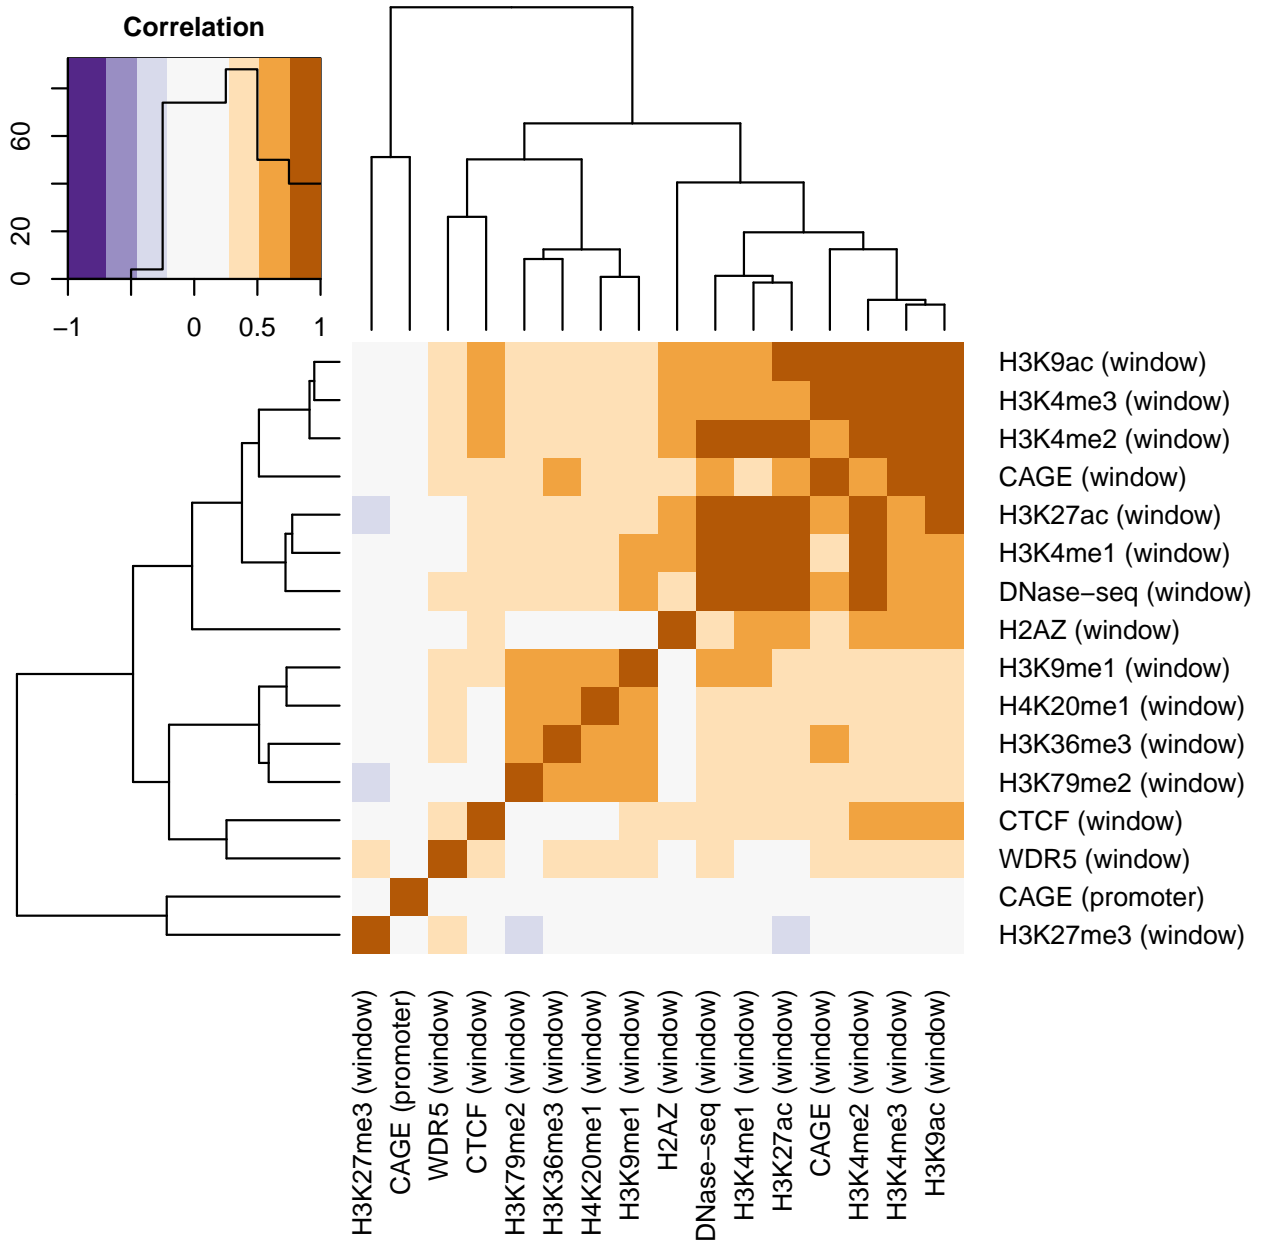

Supplementary Figure 20: Cluster heatmap of the correlation between the top 16 predictive features for NHEK.

## References

1. Rao, S. S. *et al.* A 3D Map of the Human Genome at Kilobase Resolution Reveals Principles of Chromatin Looping. *Cell* **159**, 1665–80 (2014).
2. Kuhn, M. Building Predictive Models in R Using the caret Package. *Journal of Statistical Software* **28**, 1–26 (2008).
3. Law, A. & Wiener, M. Classification and Regression by randomForest. *R News* **2**, 18–22 (2002).
4. Ridgeway, G. *Generalized boosted models: A guide to the gbm package* 2005.
5. Friedman, J., Hastie, T. & Tibshirani, R. Regularization Paths for Generalized Linear Models via Coordinate Descent. *Journal of Statistical Software* **33**, 1–22 (2010).
6. Pique-Regi, R. *et al.* Accurate inference of transcription factor binding from DNA sequence and chromatin accessibility data. *Genome Research* **21**, 447–55 (2011).
7. Yan, J. *et al.* Transcription factor binding in human cells occurs in dense clusters formed around cohesin anchor sites. *Cell* **154**, 801–13 (2013).
8. Ester, M., Kriegel, H.-P., Sander, J. & Xu, X. *A density-based algorithm for discovering clusters in large spatial databases with noise* in *Proceedings of the 2nd International Conference on Knowledge Discovery and Data Mining* (1996), 226–231.
9. Dostie, J. *et al.* Chromosome Conformation Capture Carbon Copy (5C): A massively parallel solution for mapping interactions between genomic elements. *Genome Research* **16**, 1299–1309 (2006).
10. Wiencke, J. K., Zheng, S, Morrison, Z & Yeh, R.-F. Differentially expressed genes are marked by histone 3 lysine 9 trimethylation in human cancer cells. *Oncogene* **27**, 2412–21 (2008).
